# Supplementary material
Source: MDPI journal article supplement (https://www.mdpi.com/2073-4395/12/10/2468)
Supplement: s1 [file s1]

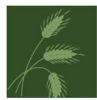

# Supplementary material of “Simulation of Multi-Species Plant Communities in Perturbed and Nutrient-Limited Grasslands: Development of the Growth Model ModVege”

|          |                                                                                   |           |
|----------|-----------------------------------------------------------------------------------|-----------|
| <b>1</b> | <b>ModVege model .....</b>                                                        | <b>2</b>  |
| <b>2</b> | <b>CoSMo suitability functions .....</b>                                          | <b>2</b>  |
| 2.1      | <i>Grazing (animal preferences) and mowing (days for restarting growth) .....</i> | 2         |
| 2.2      | <i>Phenology .....</i>                                                            | 2         |
| 2.3      | <i>Air temperature .....</i>                                                      | 2         |
| 2.4      | <i>Light interception .....</i>                                                   | 3         |
| 2.5      | <i>Water availability .....</i>                                                   | 3         |
| 2.6      | <i>Nitrogen availability .....</i>                                                | 4         |
| <b>3</b> | <b>Study-site .....</b>                                                           | <b>6</b>  |
| <b>4</b> | <b>Experimental data.....</b>                                                     | <b>7</b>  |
| <b>5</b> | <b>Model parameters.....</b>                                                      | <b>17</b> |
| <b>6</b> | <b>Results .....</b>                                                              | <b>35</b> |
| 6.1      | <i>Performance metrics and scatterplots.....</i>                                  | 35        |
| 6.2      | <i>Changes in relative abundances .....</i>                                       | 42        |
| 6.2.1    | <i>Plant functional types.....</i>                                                | 42        |
| 6.2.2    | <i>Plant species.....</i>                                                         | 45        |
| 6.2.3    | <i>Community traits.....</i>                                                      | 49        |

## 1 ModVege model

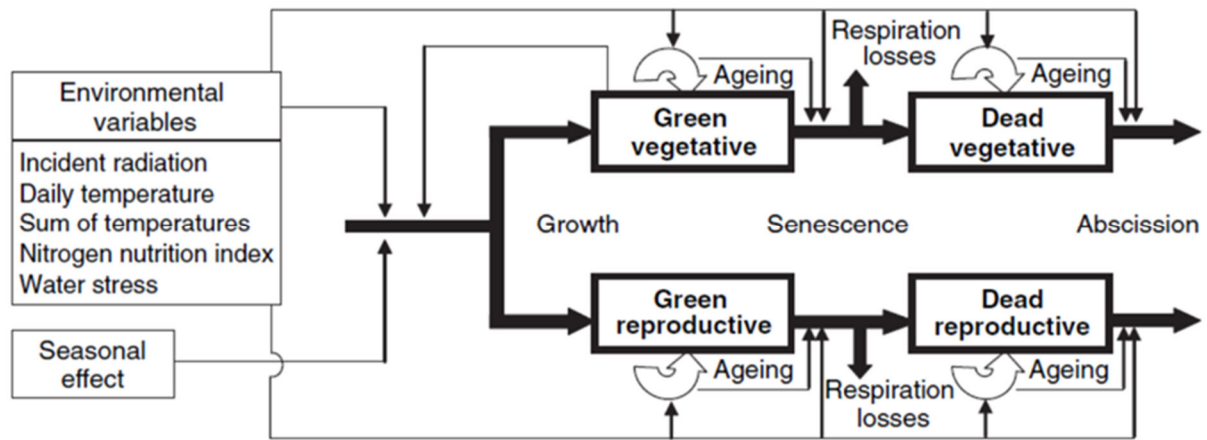

Figure S1. Overview of the ModVege model [25].

## 2 CoSMo suitability functions

### 2.1 Grazing (animal preferences) and mowing (days for restarting growth)

$$SfLiking_i(t) = \begin{cases} 0 & \text{if cut or during } SL_i \\ L_i \cdot (1 + [(2 \cdot SCP_i(t) - 3) \cdot SCP_i(t)^2]) & \text{if grazing} \\ 1 & \text{otherwise} \end{cases}$$

$L_i$  is the animal liking coefficient, ranging from 0 (highest liking) to 1 (lowest liking). A shock length ( $SL$ ) corresponds to the ability in terms of number of days to restart after cutting or grazing, computed by:

$$SL_i = \left\lceil 48 \cdot (f_{restart,i} - 1)^2 + 2 \right\rceil$$

where  $f_{restart,i}$  is the restart capacity of group/species  $i$ , 1 indicating the highest restart capacity and 0 the lowest.

### 2.2 Phenology

$$SfPhenology_i(t) = \begin{cases} 0 & \text{if annual species, which reached maturity or self-seeding} \\ 1 & \text{otherwise} \end{cases}$$

### 2.3 Air temperature

$$SfTemperature_i(t) = \begin{cases} 0 & \text{if } T(t) < T_{0,i} \text{ or } T(t) \geq 40 \\ \frac{T(t) - T_{0,i}}{T_{1,i} - T_{0,i}} & \text{if } T_{0,i} \leq T(t) < T_{1,i} \\ 1 & \text{if } T_{1,i} \leq T(t) < T_{2,i} \\ \frac{40 - T(t)}{40 - T_{2,i}} & \text{if } T_{2,i} \leq T(t) < 40 \end{cases}$$

$T(t)$  is the current air temperature ( $^{\circ}\text{C}$ ).

#### 2.4 Light interception

$$SfRad_i(t) = 0.5 + 0.25 \cdot \left( \frac{LAI_{max,i} - LAI_{community}(t)}{LAI_{max,i} + LAI_{community}(t)} + \frac{H_{max,i} - H_{community}(t)}{H_{max,i} + H_{community}(t)} \right)$$

$LAI_{max,i}$  is the maximum leaf area index for group/species  $i$  ( $\text{m}^2 \text{m}^{-2}$ ),  $LAI_{community}(t)$  is the current leaf area index for the community ( $\text{m}^2 \text{m}^{-2}$ ),  $H_{max,i}$  is the maximum height for group/species  $i$  (m) and  $H_{community}(t)$  is the current height for the community (m).

The current leaf area index for the community is calculated as follows:

$$LAI_{community}(t) = SLA_{community} * \frac{BM_{GV}(t)}{10} * PercentLAM_{community}$$

where  $SLA_i$  is the specific leaf area of group/species  $i$  ( $\text{m}^2 \text{g}^{-1}$ ),  $PercentLAM_{community}$  is the percentage of laminae in the green vegetative compartment of group/species  $i$  (0-1),  $BM(t)$  is the biomass at time  $t$  of all compartments ( $\text{kg DM ha}^{-1}$ ),  $BD_i$  is the mean bulk density of all compartments for group/species  $i$  ( $\text{g DM m}^{-3}$ ) and  $BM_{GV}$  is the biomass at time  $t$  of the green vegetative compartment ( $\text{kg DM ha}^{-1}$ ), calculated as follows:

$$H_{community}(t) = \frac{BM(t)}{BD_{community}} \cdot 10$$

#### 2.5 Water availability

$$SfWater_i(t) = \frac{SfPAW_i(t) + SfRoots_i(t)}{2}$$

$SfPAW_i(t)$  is the factor representing the effect of water availability for group/species  $i$  (0-1, unitless), calculated as follows:

$$SfPAW_i(t) = \max \left( 0; \frac{DT_i - 1}{DT_i} + \frac{SWC(t)}{DT_i} \right)$$

where  $DT_i$  is the drought tolerance of group/species  $i$  (0-1, unitless, the higher the value the higher the tolerance).

$SWC(t)$  is the current soil water content in the rooted zone simulated for the community at time step  $t$  and expressed as percentage of plant available water ( $PAW = \text{volumetric } SWC \text{ at field capacity } [FC] - \text{volumetric } SWC \text{ at permanent wilting point } [PWP]$ ).

$SfRoots_i(t)$  is the root deepening potential for group/species  $i$  (0-1, unitless), calculated as follows:

$$SfRoots_i(t) = \max \left( 0; \frac{RD_{\max,i} - RD_i(t)}{RD_{\max,i}} \right)$$

where  $RD_{\max,i}$  is the maximum rooting depth for group/species  $i$  (cm) and  $RD_i(t)$  is the current rooting depth for group/species  $i$  (cm). The latter is derived by the shoot-root ratio of each species  $i$  ( $shootRootRatio_i$ ) and the current height (cm) for group/species  $i$  ( $H_i(t)$ ):

$$RD_i(t) = shootRootRatio_i \cdot H_i(t)$$

## 2.6 Nitrogen availability

$$SfNitrogen_i(t) = \max (0; \min(SfNAv_i(t); SfNReq_i(t)))$$

$SfNAv_i(t)$  is the factor representing the nitrogen availability for group/species  $i$  (0-1, unitless), calculated as:

$$SfNAv_i(t) = \begin{cases} SMF(t) \cdot \frac{TF(t)}{8.1225} & \text{if not legume} \\ 1 & \text{if legume} \end{cases}$$

where  $SMF(t)$  is the soil moisture factor at time  $t$ , and  $TF(t)$  is the temperature response at time  $t$ . The term  $SMF(t)$  is calculated as:

$$SMF(t) = \begin{cases} 0 & \text{if } SWC < SWC_{WP} \\ \frac{SWC(t) - SWC_{WP}}{0.08} & \text{if } SWC_{WP} \leq SWC < SWC_{WP} + 0.08 \\ 1 & \text{if } SWP + 0.08 \leq SWC < SWC_S - 0.1 \\ 0.6 + 4 \cdot (SWC_S - SWC(t)) & \text{if } SWC_S - 0.1 \leq SWC \leq SWC_S \end{cases}$$

where  $SWC_S$  is the soil water content at saturation ( $m^3 m^{-3}$ ),  $SWC_{WP}$  is the soil water content at wilting point ( $m^3 m^{-3}$ ) and  $SWC(t)$  is the water content of the topsoil (0-0.3 m depth) at time  $t$  ( $m^3 m^{-3}$ ), estimated from the water reserve ( $WR_i(t)$ ) and the water holding capacity for group/species  $i$  ( $WHC_i$ ) both in mm:

$$SWC(t) = \frac{WR_i(t) \cdot SWC_S}{WHC_i}$$

under the assumption that

$$\frac{WR_i(t)}{WHC_i} = \frac{SWC(t)}{SWC_S}.$$

The term  $TF(t)$  is equal to (0-1, unitless):

$$TF(t) = 2.85 \cdot \frac{T(t)-20}{10}$$

where  $T(t)$  is the current temperature (°C).

The term  $SfNReq_i(t)$  is calculated as:

$$SfNReq_i(t) = \begin{cases} \frac{RGRLAI_{community}(t) - RGRLAI_{i,max}}{1} \cdot \frac{LNC_{i,opt}}{2} & \text{if vegetative development} \\ & \text{elsewhere} \end{cases}$$

where  $RGRLAI_{i,max}$  is the maximum relative growth rate of green leaf area index for group/species  $i$  ( $m^2 m^{-2} d^{-1}$ ),  $LNC_{i,opt}$  is the optimal leaf N concentration of group/species  $i$  (g N  $m^{-2}$ ) and  $RGRLAI_{community}(t)$  is the relative growth rate of green leaf area index for the community at time  $t$  ( $m^2 m^{-2} d^{-1}$ ), equal to  $LAI_{community}(t) - LAI_{community}(t-1)$ .

### 3 Study-site

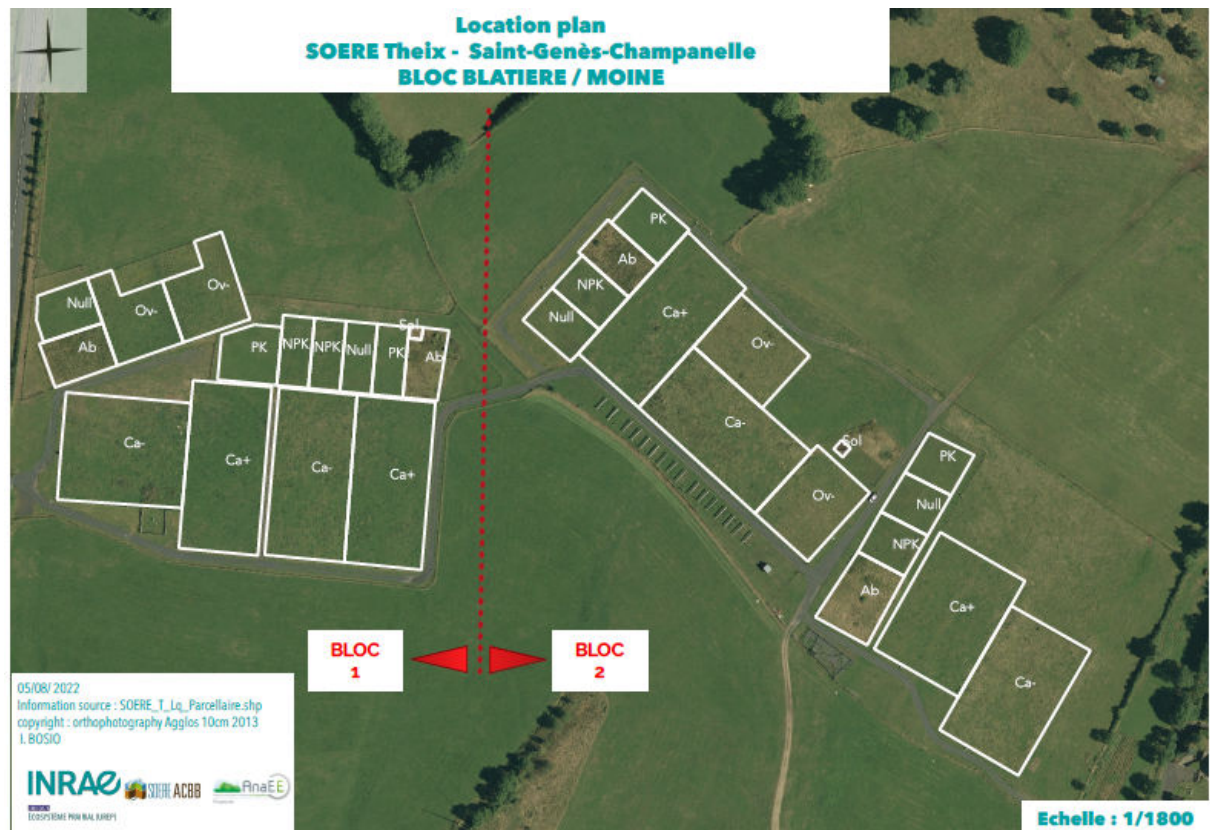

**Figure S2.** Map of the study-site. Located in the French commune of Saint-Genès-Champanelle, the site of Theix (45° 43' N, 03° 01' E, 880 m a.s.l.) belongs to the SOERE-ACBB platform (<http://www.soere-acbb.com>) and includes block 1 (*BLOC Blatière*) and block 2 (*BLOC Moine*). Each treatment is repeated twice in each block. Data from the NPK (fully fertilised and mown), NULL (unfertilised and mown) and Ab (abandoned) plots were used as a block mean, while data from the PK (partly fertilised and mown) plots and the cattle (Bo-, Bo+) and sheep (Ov-) grazed plots were not used in this study.

#### 4 Experimental data

**Table S1.** Total number of plant species detected in the study period (2006-2018) in three treatments NPK: fertilised; Null: unfertilised; Ab: abandoned) and two blocks.

| Block \ Treatment | NPK | Null | Ab |
|-------------------|-----|------|----|
|                   |     |      |    |
| 1                 | 35  | 51   | 38 |
| 2                 | 40  | 49   | 35 |

**Table S2.** Dry matter biomass data (kg ha<sup>-1</sup>) collected from 2006 to 2018 in three treatments (NPK: fertilised; Null: unfertilised; Ab: abandoned) and two blocks (doy: day of year). Grey cells indicate the determination at the end of the winter.

| Year | Block 1             |      |                     |      |                     |      | Block 2             |      |                     |      |                     |      |
|------|---------------------|------|---------------------|------|---------------------|------|---------------------|------|---------------------|------|---------------------|------|
|      | Sampling date (doy) | NPK  | Sampling date (doy) | Null | Sampling date (doy) | Ab   | Sampling date (doy) | NPK  | Sampling date (doy) | Null | Sampling date (doy) | Ab   |
| 2006 | 147                 | 5731 | 142                 | 3646 | 144                 | 3253 | 142                 | 6012 | 142                 | 2818 | 144                 | 3558 |
|      | 200                 | 4311 | 200                 | 2409 | 200                 | 6742 | 199                 | 3721 | 199                 | 1450 | 199                 | 4576 |
|      | 289                 | 2283 | 289                 | 1231 | 289                 | 5668 | 289                 | 2597 | 289                 | 995  | 289                 | 4615 |
| 2007 | 60                  | 139  | 60                  | 64   | -                   | -    | 60                  | 94   | 60                  | 103  | -                   | -    |
|      | 142                 | 6882 | 142                 | 4590 | 143                 | 4318 | 142                 | 5920 | 142                 | 5035 | 143                 | 4325 |
|      | 206                 | 4326 | 206                 | 2985 | 213                 | 5781 | 206                 | 3880 | 206                 | 2973 | 213                 | 6822 |
| 2008 | 288                 | 3281 | 288                 | 1982 | -                   | -    | 288                 | 2770 | 288                 | 1559 | -                   | -    |
|      | 78                  | 139  | 78                  | 64   | 76                  | 5038 | 78                  | 52   | 78                  | 29   | 76                  | 3468 |
|      | 170                 | 8961 | 171                 | 6110 | 172                 | 8104 | 171                 | 8097 | 171                 | 6031 | 172                 | 5942 |
| 2009 | 217                 | 4584 | 218                 | 1832 | 218                 | 8117 | 217                 | 3414 | 217                 | 2472 | 218                 | 5833 |
|      | 286                 | 1016 | 287                 | 403  | 287                 | 5119 | 287                 | 495  | 287                 | 134  | 287                 | 4163 |
|      | 71                  | 40   | 71                  | 10   | 70                  | 5200 | 71                  | 27   | 71                  | 5    | 70                  | 4752 |
| 2010 | 145                 | 6311 | 145                 | 3277 | -                   | -    | 145                 | 6048 | 145                 | 3849 | -                   | -    |
|      | 201                 | 3097 | 201                 | 1263 | -                   | -    | 201                 | 1821 | 201                 | 673  | -                   | -    |
|      | 285                 | 2511 | 285                 | 619  | -                   | -    | 285                 | 1953 | 285                 | 425  | -                   | -    |
| 2011 | 61                  | 11   | 61                  | 0    | 63                  | 6921 | 61                  | 2    | 61                  | 0    | 63                  | 4724 |
|      | 145                 | 6069 | 145                 | 2695 | 146                 | 5147 | 145                 | 6012 | 145                 | 2232 | 145                 | 5066 |
|      | 201                 | 4700 | 201                 | 2874 | 201                 | 7735 | 201                 | 3720 | 201                 | 1688 | 201                 | 8062 |
| 2012 | 286                 | 3363 | 286                 | 1508 | -                   | -    | 286                 | 1753 | 286                 | 953  | -                   | -    |
|      | 54                  | 21   | 54                  | 6    | 54                  | 7033 | 54                  | 14   | 54                  | 0    | 54                  | 5487 |
|      | 144                 | 5880 | 144                 | 2854 | 144                 | 6057 | 144                 | 4568 | 144                 | 1745 | 144                 | 4830 |
| 2013 | 200                 | 1601 | 200                 | 498  | 201                 | 5674 | 200                 | 1171 | 200                 | 450  | 201                 | 3868 |
|      | 283                 | 2193 | 283                 | 642  | -                   | -    | 283                 | 2468 | 283                 | 571  | -                   | -    |
|      | 68                  | 28   | 68                  | 12   | 65                  | 4996 | 68                  | 69   | 68                  | 18   | 65                  | 3643 |
| 2014 | 135                 | 4958 | 144                 | 2727 | 145                 | 4670 | 145                 | 4822 | 145                 | 1913 | 145                 | 5234 |
|      | 198                 | 3558 | 199                 | 2301 | 201                 | 8560 | 199                 | 3342 | 199                 | 1380 | 200                 | 8228 |
|      | 288                 | 1175 | 289                 | 221  | 289                 | 5603 | 289                 | 768  | 289                 | 197  | 289                 | 7225 |
| 2015 | 71                  | 4    | 71                  | 2    | 63                  | 4296 | 71                  | 4    | 71                  | 0    | 63                  | 3789 |
|      | 148                 | 4430 | 151                 | 2222 | 149                 | 5476 | 151                 | 5853 | 149                 | 1521 | 149                 | 6340 |
|      | 197                 | 3093 | 198                 | 1461 | 198                 | 6655 | 198                 | 2199 | 198                 | 733  | 198                 | 7004 |
| 2016 | 288                 | 3338 | 288                 | 1590 | 290                 | 6798 | 288                 | 2392 | 288                 | 883  | 290                 | 7635 |
|      | 55                  | 161  | 55                  | 21   | 57                  | 4611 | 55                  | 63   | 55                  | 3    | 57                  | 3775 |
|      | 145                 | 5565 | 146                 | 2609 | 147                 | 6903 | 146                 | 4680 | 146                 | 2401 | 147                 | 6796 |
| 2017 | 202                 | 3009 | 203                 | 1538 | 203                 | 6756 | 203                 | 2113 | 203                 | 1442 | 203                 | 6592 |
|      | 286                 | 2200 | 287                 | 843  | 287                 | 5306 | 287                 | 2247 | 287                 | 878  | 287                 | 4124 |
|      | 57                  | 129  | 57                  | 17   | 65                  | 3498 | 57                  | 85   | 57                  | 8    | 65                  | 2258 |
| 2018 | 145                 | 6933 | 146                 | 3404 | 148                 | 5500 | 146                 | 5213 | 146                 | 2867 | 148                 | 3736 |
|      | 201                 | 444  | 202                 | 180  | 202                 | 4057 | 202                 | 136  | 202                 | 110  | 202                 | 3652 |
|      | 285                 | 1735 | 287                 | 735  | 286                 | 4462 | 286                 | 1470 | 286                 | 542  | 286                 | 3670 |
| 2019 | 57                  | 23   | 57                  | 0    | 57                  | 3020 | 57                  | 29   | 57                  | 0    | 57                  | 1620 |



|      |     |      |     |      |     |      |     |      |     |      |     |      |
|------|-----|------|-----|------|-----|------|-----|------|-----|------|-----|------|
| 2017 | 145 | 6077 | 146 | 2239 | 146 | 3548 | 146 | 4957 | 146 | 2026 | 146 | 3462 |
|      | 201 | 3898 | 202 | 1798 | 202 | 4790 | 202 | 3023 | 202 | 1496 | 202 | 5132 |
|      | 291 | 196  | 292 | 84   | 292 | 5620 | 292 | 215  | 292 | 152  | 292 | 4121 |
|      | 58  | 6    | 58  | 0    | 58  | 3142 | 58  | 7    | 58  | 2    | 58  | 2133 |
|      | 141 | 4640 | 142 | 1346 | 142 | 3347 | 142 | 4688 | 142 | 1737 | 142 | 2784 |
|      | 205 | 3332 | 206 | 1669 | 205 | 4499 | 206 | 3043 | 206 | 1464 | 205 | 4312 |
|      | 289 | 843  | 290 | 111  | 289 | 4597 | 290 | 586  | 290 | 166  | 289 | 3636 |
|      | 60  | 6    | 60  | 0    | 60  | 2093 | 60  | 2    | 60  | 0    | 60  | 1852 |
|      | 143 | 5026 | 143 | 1417 | 143 | 4397 | 143 | 4439 | 143 | 1594 | 143 | 4342 |
|      | 204 | 3673 | 204 | 1021 | 204 | 3006 | 204 | 1906 | 204 | 717  | 204 | 3657 |
|      | 288 | 507  | 288 | 111  | 288 | 2868 | 288 | 350  | 288 | 63   | 288 | 2316 |
|      |     |      |     |      |     |      |     |      |     |      |     |      |

**Table S3.** Relative abundance of plant (grass) functional types (A, B, b) in three treatments (NPK: fertilised; Null: unfertilised; Ab: abandoned) and two blocks (doy: day of year)

| Year | Functional typology | Block 1           |                    |                   |                    |                   |                    | Block 2           |                    |                   |                    |                   |                    |
|------|---------------------|-------------------|--------------------|-------------------|--------------------|-------------------|--------------------|-------------------|--------------------|-------------------|--------------------|-------------------|--------------------|
|      |                     | NPK               |                    | Null              |                    | Ab                |                    | NPK               |                    | Null              |                    | Ab                |                    |
|      |                     | Survey date (doy) | Relative abundance |
|      |                     |                   |                    |                   |                    |                   |                    |                   |                    |                   |                    |                   |                    |
| 2006 | A                   |                   | 0.10               |                   | 0.10               |                   | 0.12               |                   | 0.66               |                   | 0.57               |                   | 0.56               |
|      | B                   | 124               | 0.40               | 123               | 0.60               | 124               | 0.33               | 122               | 0.24               | 123               | 0.26               | 123               | 0.19               |
|      | b                   |                   | 0.50               |                   | 0.30               |                   | 0.55               |                   | 0.10               |                   | 0.17               |                   | 0.25               |
| 2007 | A                   |                   | 0.08               |                   | 0.20               |                   | 0.16               |                   | 0.51               |                   | 0.49               |                   | 0.56               |
|      | B                   | 124               | 0.60               | 124               | 0.58               | 123               | 0.40               | 122               | 0.38               | 124               | 0.32               | 123               | 0.31               |
|      | b                   |                   | 0.32               |                   | 0.22               |                   | 0.44               |                   | 0.11               |                   | 0.19               |                   | 0.13               |
| 2008 | A                   |                   | 0.06               |                   | 0.15               |                   | 0.25               |                   | 0.60               |                   | 0.64               |                   | 0.67               |
|      | B                   | 121               | 0.44               | 124               | 0.52               | 121               | 0.32               | 119               | 0.28               | 121               | 0.16               | 118               | 0.23               |
|      | b                   |                   | 0.50               |                   | 0.34               |                   | 0.43               |                   | 0.12               |                   | 0.20               |                   | 0.10               |
| 2009 |                     |                   |                    |                   |                    |                   |                    |                   |                    |                   |                    |                   |                    |
| 2010 | A                   |                   | 0.04               |                   | 0.21               |                   | 0.29               |                   | 0.52               |                   | 0.49               |                   | 0.59               |
|      | B                   | 118               | 0.32               | 117               | 0.47               | 131               | 0.32               | 117               | 0.28               | 117               | 0.26               | 131               | 0.30               |
|      | b                   |                   | 0.64               |                   | 0.32               |                   | 0.39               |                   | 0.20               |                   | 0.25               |                   | 0.11               |
| 2011 | A                   |                   | 0.07               |                   | 0.19               |                   | 0.21               |                   | 0.46               |                   | 0.41               |                   | 0.50               |
|      | B                   | 124               | 0.42               | 123               | 0.46               | 130               | 0.37               | 122               | 0.34               | 123               | 0.31               | 132               | 0.40               |
|      | b                   |                   | 0.51               |                   | 0.35               |                   | 0.42               |                   | 0.20               |                   | 0.28               |                   | 0.10               |
| 2012 | A                   |                   | 0.07               |                   | 0.26               |                   | 0.24               |                   | 0.44               |                   | 0.42               |                   | 0.53               |
|      | B                   | 124               | 0.44               | 124               | 0.40               | 127               | 0.38               | 123               | 0.34               | 124               | 0.30               | 126               | 0.40               |
|      | b                   |                   | 0.49               |                   | 0.34               |                   | 0.38               |                   | 0.22               |                   | 0.28               |                   | 0.07               |
| 2013 | A                   |                   | 0.07               |                   | 0.19               |                   | 0.24               |                   | 0.40               |                   | 0.33               |                   | 0.57               |
|      | B                   | 127               | 0.43               | 128               | 0.49               | 137               | 0.32               | 126               | 0.40               | 126               | 0.38               | 136               | 0.30               |
|      | b                   |                   | 0.50               |                   | 0.32               |                   | 0.44               |                   | 0.20               |                   | 0.29               |                   | 0.13               |
| 2014 | A                   |                   | 0.05               |                   | 0.25               |                   | 0.22               |                   | 0.39               |                   | 0.31               |                   | 0.59               |
|      | B                   | 124               | 0.47               | 125               | 0.47               | 134               | 0.38               | 121               | 0.39               | 124               | 0.38               | 134               | 0.32               |
|      | b                   |                   | 0.48               |                   | 0.28               |                   | 0.40               |                   | 0.22               |                   | 0.31               |                   | 0.09               |
| 2015 | A                   |                   | 0.10               |                   | 0.25               |                   | 0.25               |                   | 0.48               |                   | 0.29               |                   | 0.62               |
|      | B                   | 127               | 0.44               | 129               | 0.40               | 136               | 0.33               | 126               | 0.24               | 127               | 0.31               | 133               | 0.29               |
|      | b                   |                   | 0.46               |                   | 0.35               |                   | 0.42               |                   | 0.28               |                   | 0.40               |                   | 0.09               |
| 2016 | A                   |                   | 0.03               |                   | 0.27               |                   | 0.22               |                   | 0.43               |                   | 0.28               |                   | 0.65               |
|      | B                   | 120               | 0.49               | 124               | 0.44               | 139               | 0.41               | 120               | 0.34               | 123               | 0.33               | 126               | 0.27               |
|      | b                   |                   | 0.48               |                   | 0.29               |                   | 0.37               |                   | 0.23               |                   | 0.39               |                   | 0.08               |
| 2017 | A                   |                   | 0.03               |                   | 0.23               |                   | 0.28               |                   | 0.40               |                   | 0.31               |                   | 0.74               |
|      | B                   | 123               | 0.48               | 124               | 0.52               | 130               | 0.26               | 122               | 0.34               | 123               | 0.34               | 129               | 0.17               |
|      | b                   |                   | 0.49               |                   | 0.25               |                   | 0.46               |                   | 0.26               |                   | 0.35               |                   | 0.09               |
| 2018 | A                   |                   | 0.08               |                   | 0.24               |                   | 0.35               |                   | 0.39               |                   | 0.26               |                   | 0.75               |
|      | B                   | 120               | 0.45               | 122               | 0.55               | 158               | 0.32               | 117               | 0.34               | 120               | 0.49               | 125               | 0.15               |
|      | b                   |                   | 0.48               |                   | 0.21               |                   | 0.33               |                   | 0.27               |                   | 0.25               |                   | 0.10               |



**Table S4.** Relative abundance of plant species (represented by grasses, legumes and forbs) in three treatments (NPK: fertilised; Null: unfertilised; Ab: abandoned) and two blocks (doy: day of year). Dashes (-) indicate absence of the species or mean relative abundance below the threshold value of 0.04 (4%).

| Taxonomic group | Species                      | Year | Block 1           |                    |                   |                    |                   |                    | Block 2           |                    |                   |                    |                   |                    |
|-----------------|------------------------------|------|-------------------|--------------------|-------------------|--------------------|-------------------|--------------------|-------------------|--------------------|-------------------|--------------------|-------------------|--------------------|
|                 |                              |      | NPK               |                    | Null              |                    | Ab                |                    | NPK               |                    | Null              |                    | Ab                |                    |
|                 |                              |      | Survey date (doy) | Relative abundance |
| Grass           | <i>Alopecurus pratensis</i>  | 2006 | -                 | -                  | -                 | -                  | 123               | 0.06               | 122               | 0.15               | 123               | 0.19               | 123               | 0.49               |
|                 |                              | 2007 | -                 | -                  | -                 | -                  | 124               | 0.09               | 122               | 0.11               | 124               | 0.12               | 124               | 0.40               |
|                 |                              | 2008 | -                 | -                  | -                 | -                  | 121               | 0.17               | 119               | 0.19               | 121               | 0.14               | 121               | 0.56               |
|                 |                              | 2009 | -                 | -                  | -                 | -                  | -                 | -                  | -                 | -                  | -                 | -                  | -                 | -                  |
|                 |                              | 2010 | -                 | -                  | -                 | -                  | 117               | 0.22               | 117               | 0.27               | 117               | 0.15               | 117               | 0.48               |
|                 |                              | 2011 | -                 | -                  | -                 | -                  | 123               | 0.16               | 122               | 0.23               | 123               | 0.10               | 123               | 0.45               |
|                 |                              | 2012 | -                 | -                  | -                 | -                  | 124               | 0.20               | 123               | 0.27               | 124               | 0.14               | 124               | 0.49               |
|                 |                              | 2013 | -                 | -                  | -                 | -                  | 126               | 0.20               | 126               | 0.26               | 126               | 0.12               | 126               | 0.43               |
|                 |                              | 2014 | -                 | -                  | -                 | -                  | 124               | 0.18               | 121               | 0.26               | 124               | 0.09               | 124               | 0.52               |
|                 |                              | 2015 | -                 | -                  | -                 | -                  | 127               | 0.20               | 126               | 0.27               | 127               | 0.04               | 127               | 0.42               |
|                 |                              | 2016 | -                 | -                  | -                 | -                  | 123               | 0.16               | 120               | 0.25               | 123               | 0.07               | 123               | 0.42               |
|                 |                              | 2017 | -                 | -                  | -                 | -                  | 123               | 0.18               | 122               | 0.25               | 123               | 0.09               | 123               | 0.44               |
|                 |                              | 2018 | -                 | -                  | -                 | -                  | 120               | 0.19               | 117               | 0.23               | 120               | 0.08               | 120               | 0.45               |
|                 | <i>Arrhenatherum elatius</i> | 2006 | -                 | -                  | -                 | -                  | 123               | 0.02               | -                 | -                  | -                 | -                  | 123               | 0.02               |
|                 |                              | 2007 | -                 | -                  | -                 | -                  | 124               | 0.00               | -                 | -                  | -                 | -                  | 124               | 0.07               |
|                 |                              | 2008 | -                 | -                  | -                 | -                  | 121               | 0.00               | -                 | -                  | -                 | -                  | 121               | 0.05               |
|                 |                              | 2009 | -                 | -                  | -                 | -                  | -                 | -                  | -                 | -                  | -                 | -                  | -                 | -                  |
|                 |                              | 2010 | -                 | -                  | -                 | -                  | 117               | 0.04               | -                 | -                  | -                 | -                  | 117               | 0.13               |
|                 |                              | 2011 | -                 | -                  | -                 | -                  | 123               | 0.01               | -                 | -                  | -                 | -                  | 123               | 0.12               |
|                 |                              | 2012 | -                 | -                  | -                 | -                  | 124               | 0.01               | -                 | -                  | -                 | -                  | 124               | 0.11               |
|                 |                              | 2013 | -                 | -                  | -                 | -                  | 126               | 0.08               | -                 | -                  | -                 | -                  | 126               | 0.10               |
|                 |                              | 2014 | -                 | -                  | -                 | -                  | 124               | 0.07               | -                 | -                  | -                 | -                  | 124               | 0.11               |
|                 |                              | 2015 | -                 | -                  | -                 | -                  | 127               | 0.10               | -                 | -                  | -                 | -                  | 127               | 0.10               |
|                 |                              | 2016 | -                 | -                  | -                 | -                  | 123               | 0.10               | -                 | -                  | -                 | -                  | 123               | 0.07               |
|                 |                              | 2017 | -                 | -                  | -                 | -                  | 123               | 0.07               | -                 | -                  | -                 | -                  | 123               | 0.07               |
|                 |                              | 2018 | -                 | -                  | -                 | -                  | 120               | 0.13               | -                 | -                  | -                 | -                  | 120               | 0.09               |
|                 | <i>Dactylis glomerata</i>    | 2006 | -                 | -                  | -                 | -                  | 123               | 0.03               | -                 | -                  | -                 | -                  | -                 | -                  |
|                 |                              | 2007 | -                 | -                  | -                 | -                  | 124               | 0.05               | -                 | -                  | -                 | -                  | -                 | -                  |
|                 |                              | 2008 | -                 | -                  | -                 | -                  | 121               | 0.09               | -                 | -                  | -                 | -                  | -                 | -                  |
|                 |                              | 2009 | -                 | -                  | -                 | -                  | -                 | -                  | -                 | -                  | -                 | -                  | -                 | -                  |
|                 |                              | 2010 | -                 | -                  | -                 | -                  | 117               | 0.11               | -                 | -                  | -                 | -                  | -                 | -                  |
|                 |                              | 2011 | -                 | -                  | -                 | -                  | 123               | 0.12               | -                 | -                  | -                 | -                  | -                 | -                  |
|                 |                              | 2012 | -                 | -                  | -                 | -                  | 124               | 0.08               | -                 | -                  | -                 | -                  | -                 | -                  |

|  |                            |      |     |      |     |      |     |      |     |      |     |      |     |      |
|--|----------------------------|------|-----|------|-----|------|-----|------|-----|------|-----|------|-----|------|
|  |                            |      |     |      |     |      |     |      |     |      |     |      |     |      |
|  |                            |      |     |      |     |      |     |      |     |      |     |      |     |      |
|  |                            |      |     |      |     |      |     |      |     |      |     |      |     |      |
|  |                            |      |     |      |     |      |     |      |     |      |     |      |     |      |
|  |                            |      |     |      |     |      |     |      |     |      |     |      |     |      |
|  |                            |      |     |      |     |      |     |      |     |      |     |      |     |      |
|  | <i>Elymus repens</i>       | 2013 | -   | -    | -   | -    | 126 | 0.01 | -   | -    | -   | -    | -   | -    |
|  |                            | 2014 | -   | -    | -   | -    | 124 | 0.05 | -   | -    | -   | -    | -   | -    |
|  |                            | 2015 | -   | -    | -   | -    | 127 | 0.04 | -   | -    | -   | -    | -   | -    |
|  |                            | 2016 | -   | -    | -   | -    | 123 | 0.03 | -   | -    | -   | -    | -   | -    |
|  |                            | 2017 | -   | -    | -   | -    | 123 | 0.01 | -   | -    | -   | -    | -   | -    |
|  |                            | 2018 | -   | -    | -   | -    | 120 | 0.00 | -   | -    | -   | -    | -   | -    |
|  |                            | 2006 | 124 | 0.27 | 123 | 0.10 | 123 | 0.43 | -   | -    | -   | -    | 123 | 0.05 |
|  |                            | 2007 | 124 | 0.19 | 124 | 0.09 | 124 | 0.43 | -   | -    | -   | -    | 124 | 0.04 |
|  |                            | 2008 | 121 | 0.29 | 124 | 0.11 | 121 | 0.40 | -   | -    | -   | -    | 121 | 0.00 |
|  |                            | 2009 |     |      |     |      |     | -    |     |      |     |      |     |      |
|  |                            | 2010 | 118 | 0.40 | 117 | 0.09 | 117 | 0.36 | -   | -    | -   | -    | 117 | 0.08 |
|  |                            | 2011 | 124 | 0.36 | 123 | 0.07 | 123 | 0.36 | -   | -    | -   | -    | 123 | 0.10 |
|  |                            | 2012 | 124 | 0.34 | 124 | 0.06 | 124 | 0.34 | -   | -    | -   | -    | 124 | 0.07 |
|  |                            | 2013 | 127 | 0.34 | 128 | 0.07 | 126 | 0.37 | -   | -    | -   | -    | 126 | 0.09 |
|  |                            | 2014 | 124 | 0.31 | 125 | 0.02 | 124 | 0.35 | -   | -    | -   | -    | 124 | 0.09 |
|  |                            | 2015 | 127 | 0.31 | 129 | 0.03 | 127 | 0.36 | -   | -    | -   | -    | 127 | 0.07 |
|  |                            | 2016 | 120 | 0.31 | 124 | 0.08 | 123 | 0.27 | -   | -    | -   | -    | 123 | 0.07 |
|  |                            | 2017 | 123 | 0.30 | 124 | 0.07 | 123 | 0.32 | -   | -    | -   | -    | 123 | 0.07 |
|  |                            | 2018 | 120 | 0.33 | 122 | 0.05 | 120 | 0.19 | -   | -    | -   | -    | 120 | 0.08 |
|  | <i>Festuca arundinacea</i> | 2006 | 124 | 0.04 | 123 | 0.11 | 123 | 0.16 | -   | -    | 123 | 0.05 | -   | -    |
|  |                            | 2007 | 124 | 0.16 | 124 | 0.07 | 124 | 0.16 | -   | -    | 124 | 0.06 | -   | -    |
|  |                            | 2008 | 121 | 0.12 | 124 | 0.13 | 121 | 0.11 | -   | -    | 121 | 0.04 | -   | -    |
|  |                            | 2009 |     |      |     |      |     | -    |     |      |     |      |     |      |
|  |                            | 2010 | 118 | 0.09 | 117 | 0.10 | 117 | 0.09 | -   | -    | 117 | 0.05 | -   | -    |
|  |                            | 2011 | 124 | 0.12 | 123 | 0.11 | 123 | 0.12 | -   | -    | 123 | 0.06 | -   | -    |
|  |                            | 2012 | 124 | 0.11 | 124 | 0.09 | 124 | 0.12 | -   | -    | 124 | 0.06 | -   | -    |
|  |                            | 2013 | 127 | 0.12 | 128 | 0.10 | 126 | 0.02 | -   | -    | 126 | 0.06 | -   | -    |
|  |                            | 2014 | 124 | 0.11 | 125 | 0.11 | 124 | 0.04 | -   | -    | 124 | 0.07 | -   | -    |
|  |                            | 2015 | 127 | 0.12 | 129 | 0.16 | 127 | 0.03 | -   | -    | 127 | 0.06 | -   | -    |
|  |                            | 2016 | 120 | 0.12 | 124 | 0.21 | 123 | 0.04 | -   | -    | 123 | 0.09 | -   | -    |
|  |                            | 2017 | 123 | 0.10 | 124 | 0.22 | 123 | 0.01 | -   | -    | 123 | 0.12 | -   | -    |
|  |                            | 2018 | 120 | 0.13 | 122 | 0.19 | 120 | 0.02 | -   | -    | 120 | 0.10 | -   | -    |
|  | <i>Holcus lanatus</i>      | 2006 | -   | -    | 123 | 0.01 | -   | -    | 122 | 0.06 | -   | -    | 123 | 0.18 |
|  |                            | 2007 | -   | -    | 124 | 0.01 | -   | -    | 122 | 0.11 | -   | -    | 124 | 0.31 |
|  |                            | 2008 | -   | -    | 124 | 0.04 | -   | -    | 119 | 0.16 | -   | -    | 121 | 0.23 |
|  |                            | 2009 |     |      |     |      |     | -    |     |      |     |      |     |      |
|  |                            | 2010 | -   | -    | 117 | 0.03 | -   | -    | 117 | 0.08 | -   | -    | 117 | 0.03 |
|  |                            | 2011 | -   | -    | 123 | 0.05 | -   | -    | 122 | 0.09 | -   | -    | 123 | 0.01 |
|  |                            | 2012 | -   | -    | 124 | 0.07 | -   | -    | 123 | 0.06 | -   | -    | 124 | 0.02 |
|  |                            | 2013 | -   | -    | 128 | 0.07 | -   | -    | 126 | 0.08 | -   | -    | 126 | 0.00 |
|  |                            | 2014 | -   | -    | 125 | 0.10 | -   | -    | 121 | 0.07 | -   | -    | 124 | 0.00 |
|  |                            | 2015 | -   | -    | 129 | 0.10 | -   | -    | 126 | 0.11 | -   | -    | 127 | 0.01 |
|  |                            | 2016 | -   | -    | 124 | 0.14 | -   | -    | 120 | 0.07 | -   | -    | 123 | 0.01 |
|  |                            | 2017 | -   | -    | 124 | 0.12 | -   | -    | 122 | 0.04 | -   | -    | 123 | 0.00 |
|  |                            | 2018 | -   | -    | 122 | 0.13 | -   | -    | 117 | 0.07 | -   | -    | 120 | 0.00 |
|  | <i>Lolium multiflorum</i>  | 2006 | 124 | 0.00 | -   | -    | -   | -    | -   | -    | -   | -    | -   | -    |
|  |                            | 2007 | 124 | 0.14 | -   | -    | -   | -    | -   | -    | -   | -    | -   | -    |
|  |                            | 2008 | 121 | 0.14 | -   | -    | -   | -    | -   | -    | -   | -    | -   | -    |
|  |                            | 2009 |     |      |     |      |     | -    |     |      |     |      |     |      |
|  |                            | 2010 | 118 | 0.04 | -   | -    | -   | -    | -   | -    | -   | -    | -   | -    |

|                       |      |     |      |     |      |     |      |     |      |     |      |     |      |
|-----------------------|------|-----|------|-----|------|-----|------|-----|------|-----|------|-----|------|
| <i>Lolium perenne</i> | 2011 | 124 | 0.04 | -   | -    | -   | -    | -   | -    | -   | -    | -   | -    |
|                       | 2012 | 124 | 0.05 | -   | -    | -   | -    | -   | -    | -   | -    | -   | -    |
|                       | 2013 | 127 | 0.08 | -   | -    | -   | -    | -   | -    | -   | -    | -   | -    |
|                       | 2014 | 124 | 0.12 | -   | -    | -   | -    | -   | -    | -   | -    | -   | -    |
|                       | 2015 | 127 | 0.12 | -   | -    | -   | -    | -   | -    | -   | -    | -   | -    |
|                       | 2016 | 120 | 0.14 | -   | -    | -   | -    | -   | -    | -   | -    | -   | -    |
|                       | 2017 | 123 | 0.12 | -   | -    | -   | -    | -   | -    | -   | -    | -   | -    |
|                       | 2018 | 120 | 0.11 | -   | -    | -   | -    | -   | -    | -   | -    | -   | -    |
|                       | 2006 | -   | -    | -   | -    | -   | -    | 122 | 0.17 | 123 | 0.13 | -   | -    |
|                       | 2007 | -   | -    | -   | -    | -   | -    | 122 | 0.17 | 124 | 0.16 | -   | -    |
|                       | 2008 | -   | -    | -   | -    | -   | -    | 119 | 0.16 | 121 | 0.20 | -   | -    |
|                       | 2009 | -   | -    | -   | -    | -   | -    | -   | -    | -   | -    | -   | -    |
|                       | 2010 | -   | -    | -   | -    | -   | -    | 117 | 0.05 | 117 | 0.09 | -   | -    |
|                       | 2011 | -   | -    | -   | -    | -   | -    | 122 | 0.04 | 123 | 0.10 | -   | -    |
|                       | 2012 | -   | -    | -   | -    | -   | -    | 123 | 0.08 | 124 | 0.12 | -   | -    |
|                       | 2013 | -   | -    | -   | -    | -   | -    | 126 | 0.04 | 126 | 0.08 | -   | -    |
|                       | 2014 | -   | -    | -   | -    | -   | -    | 121 | 0.05 | 124 | 0.12 | -   | -    |
|                       | 2015 | -   | -    | -   | -    | -   | -    | 126 | 0.03 | 127 | 0.13 | -   | -    |
|                       | 2016 | -   | -    | -   | -    | -   | -    | 120 | 0.03 | 123 | 0.15 | -   | -    |
|                       | 2017 | -   | -    | -   | -    | -   | -    | 122 | 0.03 | 123 | 0.15 | -   | -    |
|                       | 2018 | -   | -    | -   | -    | -   | -    | 117 | 0.03 | 120 | 0.11 | -   | -    |
| <i>Poa pratensis</i>  | 2006 | 124 | 0.26 | 123 | 0.26 | 123 | 0.30 | 122 | 0.16 | 123 | 0.14 | 123 | 0.25 |
|                       | 2007 | 124 | 0.19 | 124 | 0.22 | 124 | 0.28 | 122 | 0.18 | 124 | 0.17 | 124 | 0.18 |
|                       | 2008 | 121 | 0.14 | 124 | 0.17 | 121 | 0.23 | 119 | 0.14 | 121 | 0.03 | 121 | 0.15 |
|                       | 2009 | -   | -    | -   | -    | -   | -    | -   | -    | -   | -    | -   | -    |
|                       | 2010 | 118 | 0.11 | 117 | 0.12 | 117 | 0.17 | 117 | 0.17 | 117 | 0.16 | 117 | 0.23 |
|                       | 2011 | 124 | 0.18 | 123 | 0.14 | 123 | 0.22 | 122 | 0.24 | 123 | 0.16 | 123 | 0.24 |
|                       | 2012 | 124 | 0.18 | 124 | 0.14 | 124 | 0.23 | 123 | 0.26 | 124 | 0.20 | 124 | 0.25 |
|                       | 2013 | 127 | 0.18 | 128 | 0.16 | 126 | 0.25 | 126 | 0.29 | 126 | 0.24 | 126 | 0.25 |
|                       | 2014 | 124 | 0.20 | 125 | 0.17 | 124 | 0.21 | 121 | 0.29 | 124 | 0.22 | 124 | 0.13 |
|                       | 2015 | 127 | 0.18 | 129 | 0.10 | 127 | 0.14 | 126 | 0.13 | 127 | 0.16 | 127 | 0.14 |
|                       | 2016 | 120 | 0.20 | 124 | 0.17 | 123 | 0.17 | 120 | 0.22 | 123 | 0.21 | 123 | 0.14 |
| <i>Poa trivialis</i>  | 2017 | 123 | 0.22 | 124 | 0.22 | 123 | 0.19 | 122 | 0.24 | 123 | 0.21 | 123 | 0.12 |
|                       | 2018 | 120 | 0.17 | 122 | 0.19 | 120 | 0.06 | 117 | 0.23 | 120 | 0.23 | 120 | 0.05 |
|                       | 2006 | -   | -    | 123 | 0.02 | -   | -    | -   | -    | -   | -    | -   | -    |
|                       | 2007 | -   | -    | 124 | 0.02 | -   | -    | -   | -    | -   | -    | -   | -    |
|                       | 2008 | -   | -    | 124 | 0.09 | -   | -    | -   | -    | -   | -    | -   | -    |
|                       | 2009 | -   | -    | -   | -    | -   | -    | -   | -    | -   | -    | -   | -    |
|                       | 2010 | -   | -    | 117 | 0.06 | -   | -    | -   | -    | -   | -    | -   | -    |
|                       | 2011 | -   | -    | 123 | 0.10 | -   | -    | -   | -    | -   | -    | -   | -    |
|                       | 2012 | -   | -    | 124 | 0.11 | -   | -    | -   | -    | -   | -    | -   | -    |
|                       | 2013 | -   | -    | 128 | 0.10 | -   | -    | -   | -    | -   | -    | -   | -    |
|                       | 2014 | -   | -    | 125 | 0.11 | -   | -    | -   | -    | -   | -    | -   | -    |
| <i>Trisetum</i>       | 2015 | -   | -    | 129 | 0.18 | -   | -    | -   | -    | -   | -    | -   | -    |
|                       | 2016 | -   | -    | 124 | 0.06 | -   | -    | -   | -    | -   | -    | -   | -    |
|                       | 2017 | -   | -    | 124 | 0.03 | -   | -    | -   | -    | -   | -    | -   | -    |
|                       | 2018 | -   | -    | 122 | 0.01 | -   | -    | -   | -    | -   | -    | -   | -    |
|                       | 2006 | -   | -    | -   | -    | -   | -    | 122 | 0.05 | 123 | 0.10 | -   | -    |
| <i>Trisetum</i>       | 2007 | -   | -    | -   | -    | -   | -    | 122 | 0.03 | 124 | 0.10 | -   | -    |
|                       | 2008 | -   | -    | -   | -    | -   | -    | 119 | 0.04 | 121 | 0.09 | -   | -    |

|        |                             |      |   |   |     |      |     |      |      |      |      |      |   |
|--------|-----------------------------|------|---|---|-----|------|-----|------|------|------|------|------|---|
| Legume | <i>Trifolium repens</i>     | 2009 |   |   |     |      |     | -    |      |      |      |      |   |
|        |                             | 2010 | - | - | -   | -    | -   | 117  | 0.06 | 117  | 0.08 | -    | - |
|        |                             | 2011 | - | - | -   | -    | -   | 122  | 0.07 | 123  | 0.07 | -    | - |
|        |                             | 2012 | - | - | -   | -    | -   | 123  | 0.07 | 124  | 0.11 | -    | - |
|        |                             | 2013 | - | - | -   | -    | -   | 126  | 0.09 | 126  | 0.10 | -    | - |
|        |                             | 2014 | - | - | -   | -    | -   | 121  | 0.12 | 124  | 0.10 | -    | - |
|        |                             | 2015 | - | - | -   | -    | -   | 126  | 0.17 | 127  | 0.16 | -    | - |
|        |                             | 2016 | - | - | -   | -    | -   | 120  | 0.15 | 123  | 0.20 | -    | - |
|        |                             | 2017 | - | - | -   | -    | -   | 122  | 0.16 | 123  | 0.18 | -    | - |
|        |                             | 2018 | - | - | -   | -    | -   | 117  | 0.18 | 120  | 0.15 | -    | - |
|        |                             | 2006 | - | - | 123 | 0.16 |     | -    | -    | 123  | 0.09 |      |   |
|        |                             | 2007 | - | - | 124 | 0.28 |     | -    | -    | 124  | 0.15 |      |   |
|        |                             | 2008 | - | - | 124 | 0.19 |     | -    | -    | 121  | 0.26 |      |   |
|        |                             | 2009 |   |   |     |      |     | -    |      |      |      |      |   |
|        |                             | 2010 | - | - | 117 | 0.30 |     | -    | -    | 117  | 0.19 |      |   |
|        |                             | 2011 | - | - | 123 | 0.26 |     | -    | -    | 123  | 0.25 |      |   |
|        |                             | 2012 | - | - | 124 | 0.26 |     | -    | -    | 124  | 0.14 |      |   |
|        |                             | 2013 | - | - | 128 | 0.25 |     | -    | -    | 126  | 0.13 |      |   |
|        |                             | 2014 | - | - | 125 | 0.25 |     | -    | -    | 124  | 0.15 |      |   |
|        |                             | 2015 | - | - | 129 | 0.16 |     | -    | -    | 127  | 0.22 |      |   |
|        |                             | 2016 | - | - | 124 | 0.02 |     | -    | -    | 123  | 0.07 |      |   |
|        |                             | 2017 | - | - | 124 | 0.05 |     | -    | -    | 123  | 0.07 |      |   |
|        |                             | 2018 | - | - | 122 | 0.13 |     | -    | -    | 120  | 0.07 |      |   |
| Forb   | <i>Achillea millefolium</i> | 2006 | - | - | 123 | 0.05 | -   | -    | 122  | 0.12 | 123  | 0.05 |   |
|        |                             | 2007 | - | - | 124 | 0.03 | -   | -    | 122  | 0.13 | 124  | 0.06 |   |
|        |                             | 2008 | - | - | 124 | 0.01 | -   | -    | 119  | 0.08 | 121  | 0.05 |   |
|        |                             | 2009 |   |   |     |      |     | -    |      |      |      |      |   |
|        |                             | 2010 | - | - | 117 | 0.03 | -   | -    | 117  | 0.06 | 117  | 0.04 |   |
|        |                             | 2011 | - | - | 123 | 0.03 | -   | -    | 122  | 0.04 | 123  | 0.07 |   |
|        |                             | 2012 | - | - | 124 | 0.05 | -   | -    | 123  | 0.02 | 124  | 0.04 |   |
|        |                             | 2013 | - | - | 128 | 0.05 | -   | -    | 126  | 0.05 | 126  | 0.07 |   |
|        |                             | 2014 | - | - | 125 | 0.06 | -   | -    | 121  | 0.03 | 124  | 0.08 |   |
|        |                             | 2015 | - | - | 129 | 0.07 | -   | -    | 126  | 0.07 | 127  | 0.08 |   |
|        |                             | 2016 | - | - | 124 | 0.10 | -   | -    | 120  | 0.07 | 123  | 0.07 |   |
|        |                             | 2017 | - | - | 124 | 0.12 | -   | -    | 122  | 0.06 | 123  | 0.06 |   |
|        |                             | 2018 | - | - | 122 | 0.16 | -   | -    | 117  | 0.10 | 120  | 0.12 |   |
|        |                             | 2006 | - | - | -   | -    | 123 | 0.00 | -    | -    | -    | -    | - |
|        |                             | 2007 | - | - | -   | -    | 124 | 0.00 | -    | -    | -    | -    | - |
|        |                             | 2008 | - | - | -   | -    | 121 | 0.00 | -    | -    | -    | -    | - |
|        |                             | 2009 |   |   |     |      |     | -    |      |      |      |      |   |
|        |                             | 2010 | - | - | -   | -    | 117 | 0.00 | -    | -    | -    | -    | - |
|        |                             | 2011 | - | - | -   | -    | 123 | 0.00 | -    | -    | -    | -    | - |
|        |                             | 2012 | - | - | -   | -    | 124 | 0.00 | -    | -    | -    | -    | - |
|        |                             | 2013 | - | - | -   | -    | 126 | 0.01 | -    | -    | -    | -    | - |
|        |                             | 2014 | - | - | -   | -    | 124 | 0.04 | -    | -    | -    | -    | - |
|        |                             | 2015 | - | - | -   | -    | 127 | 0.03 | -    | -    | -    | -    | - |
|        |                             | 2016 | - | - | -   | -    | 123 | 0.14 | -    | -    | -    | -    | - |
|        |                             | 2017 | - | - | -   | -    | 123 | 0.11 | -    | -    | -    | -    | - |
|        |                             | 2018 | - | - | -   | -    | 120 | 0.26 | -    | -    | -    | -    | - |
|        | <i>Galium aparine</i>       |      |   |   |     |      |     |      |      |      |      |      |   |

|                             |      |     |      |     |      |     |      |     |      |     |      |     |      |
|-----------------------------|------|-----|------|-----|------|-----|------|-----|------|-----|------|-----|------|
| <i>Stellaria media</i>      | 2006 | 124 | 0.10 | -   | -    | -   | -    | 122 | 0.08 | -   | -    | -   | -    |
|                             | 2007 | 124 | 0.03 | -   | -    | -   | -    | 122 | 0.02 | -   | -    | -   | -    |
|                             | 2008 | 121 | 0.01 | -   | -    | -   | -    | 119 | 0.01 | -   | -    | -   | -    |
|                             | 2009 |     |      |     |      |     | -    |     |      |     |      |     |      |
|                             | 2010 | 118 | 0.02 | -   | -    | -   | -    | 117 | 0.03 | -   | -    | -   | -    |
|                             | 2011 | 124 | 0.01 | -   | -    | -   | -    | 122 | 0.05 | -   | -    | -   | -    |
|                             | 2012 | 124 | 0.02 | -   | -    | -   | -    | 123 | 0.03 | -   | -    | -   | -    |
|                             | 2013 | 127 | 0.03 | -   | -    | -   | -    | 126 | 0.04 | -   | -    | -   | -    |
|                             | 2014 | 124 | 0.03 | -   | -    | -   | -    | 121 | 0.01 | -   | -    | -   | -    |
|                             | 2015 | 127 | 0.01 | -   | -    | -   | -    | 126 | 0.00 | -   | -    | -   | -    |
|                             | 2016 | 120 | 0.05 | -   | -    | -   | -    | 120 | 0.08 | -   | -    | -   | -    |
|                             | 2017 | 123 | 0.14 | -   | -    | -   | -    | 122 | 0.13 | -   | -    | -   | -    |
|                             | 2018 | 120 | 0.13 | -   | -    | -   | -    | 117 | 0.06 | -   | -    | -   | -    |
| <i>Taraxacum officinale</i> | 2006 | 124 | 0.32 | 123 | 0.29 | -   | -    | 122 | 0.22 | 123 | 0.25 | -   | -    |
|                             | 2007 | 124 | 0.29 | 124 | 0.28 | -   | -    | 122 | 0.25 | 124 | 0.18 | -   | -    |
|                             | 2008 | 121 | 0.31 | 124 | 0.26 | -   | -    | 119 | 0.21 | 121 | 0.19 | -   | -    |
|                             | 2009 |     |      |     |      |     | -    |     |      |     |      |     |      |
|                             | 2010 | 118 | 0.35 | 117 | 0.27 | -   | -    | 117 | 0.29 | 117 | 0.23 | -   | -    |
|                             | 2011 | 124 | 0.28 | 123 | 0.23 | -   | -    | 122 | 0.24 | 123 | 0.19 | -   | -    |
|                             | 2012 | 124 | 0.29 | 124 | 0.22 | -   | -    | 123 | 0.20 | 124 | 0.20 | -   | -    |
|                             | 2013 | 127 | 0.24 | 128 | 0.20 | -   | -    | 126 | 0.15 | 126 | 0.19 | -   | -    |
|                             | 2014 | 124 | 0.23 | 125 | 0.18 | -   | -    | 121 | 0.17 | 124 | 0.17 | -   | -    |
|                             | 2015 | 127 | 0.25 | 129 | 0.20 | -   | -    | 126 | 0.21 | 127 | 0.15 | -   | -    |
|                             | 2016 | 120 | 0.18 | 124 | 0.21 | -   | -    | 120 | 0.12 | 123 | 0.14 | -   | -    |
|                             | 2017 | 123 | 0.12 | 124 | 0.18 | -   | -    | 122 | 0.09 | 123 | 0.12 | -   | -    |
|                             | 2018 | 120 | 0.13 | 122 | 0.14 | -   | -    | 117 | 0.12 | 120 | 0.14 | -   | -    |
| <i>Urtica dioica</i>        | 2006 | -   | -    | -   | -    | 123 | 0.00 | -   | -    | -   | -    | 123 | 0.01 |
|                             | 2007 | -   | -    | -   | -    | 124 | 0.00 | -   | -    | -   | -    | 124 | 0.01 |
|                             | 2008 | -   | -    | -   | -    | 121 | 0.00 | -   | -    | -   | -    | 121 | 0.01 |
|                             | 2009 |     |      |     |      |     | -    |     |      |     |      |     |      |
|                             | 2010 | -   | -    | -   | -    | 117 | 0.01 | -   | -    | -   | -    | 117 | 0.05 |
|                             | 2011 | -   | -    | -   | -    | 123 | 0.02 | -   | -    | -   | -    | 123 | 0.08 |
|                             | 2012 | -   | -    | -   | -    | 124 | 0.03 | -   | -    | -   | -    | 124 | 0.05 |
|                             | 2013 | -   | -    | -   | -    | 126 | 0.05 | -   | -    | -   | -    | 126 | 0.13 |
|                             | 2014 | -   | -    | -   | -    | 124 | 0.05 | -   | -    | -   | -    | 124 | 0.16 |
|                             | 2015 | -   | -    | -   | -    | 127 | 0.10 | -   | -    | -   | -    | 127 | 0.26 |
|                             | 2016 | -   | -    | -   | -    | 123 | 0.10 | -   | -    | -   | -    | 123 | 0.30 |
|                             | 2017 | -   | -    | -   | -    | 123 | 0.10 | -   | -    | -   | -    | 123 | 0.30 |
|                             | 2018 | -   | -    | -   | -    | 120 | 0.15 | -   | -    | -   | -    | 120 | 0.33 |



## 5 Model parameters

**Table S5.** ModVege parameters common to all functional types or species [25].

| Parameter  | Description                                                                        | Block 1 |       |       | Block 2 |       |       |
|------------|------------------------------------------------------------------------------------|---------|-------|-------|---------|-------|-------|
|            |                                                                                    | NPK     | Null  | Ab    | NPK     | Null  | Ab    |
| WR         | Water reserve (mm)                                                                 | 60      | 60    | 60    | 60      | 60    | 60    |
| Alpha_PAR  | Light extinction coefficient                                                       | 0.044   | 0.044 | 0.044 | 0.044   | 0.044 | 0.044 |
| Tbase      | Base temperature subtracted each day for the calculation of plant development (°C) | 0       | 0     | 0     | 0       | 0     | 0     |
| T0         | Temperature threshold for photosynthesis activation (°C)                           | 4       | 4     | 4     | 4       | 4     | 4     |
| T1         | Optimal temperature for growth (°C)                                                | 10      | 10    | 10    | 10      | 10    | 10    |
| T2         | Temperature threshold for growth decline (°C)                                      | 20      | 20    | 20    | 20      | 20    | 20    |
| rho_GV     | Bulk density of GV (g m <sup>-3</sup> )                                            | 850     | 850   | 850   | 850     | 850   | 850   |
| percentLAM | Fraction of leaf of laminae in GV                                                  | 0.68    | 0.68  | 0.68  | 0.68    | 0.68  | 0.68  |
| Rho_GR     | Bulk density of GR (g m <sup>-3</sup> )                                            | 300     | 300   | 300   | 300     | 300   | 300   |
| K_VS       | Senescence coefficient DV (°C d <sup>-1</sup> )                                    | 0.002   | 0.002 | 0.002 | 0.002   | 0.002 | 0.002 |
| Kl_VS      | Abscission coefficient DV (°C d <sup>-1</sup> )                                    | 0.001   | 0.001 | 0.001 | 0.001   | 0.001 | 0.001 |
| Rho_VS     | Bulk density of DV (g m <sup>-3</sup> )                                            | 500     | 500   | 500   | 500     | 500   | 500   |
| K_RS       | Senescence coefficient DR (°C d <sup>-1</sup> )                                    | 0.001   | 0.001 | 0.001 | 0.001   | 0.001 | 0.001 |

|           |                                                            |        |        |        |        |        |        |
|-----------|------------------------------------------------------------|--------|--------|--------|--------|--------|--------|
| Kl_RS     | Abscission coefficient of DR ( $^{\circ}\text{C d}^{-1}$ ) | 0.0005 | 0.0005 | 0.0005 | 0.0005 | 0.0005 | 0.0005 |
| Rho_RS    | Bulk density of DR ( $\text{g m}^{-3}$ )                   | 150    | 150    | 150    | 150    | 150    | 150    |
| gammaGV   | Respiratory C loss during senescence of GV                 | 0.4    | 0.4    | 0.4    | 0.4    | 0.4    | 0.4    |
| gammaGR   | Respiratory C loss during senescence of GR                 | 0.2    | 0.2    | 0.2    | 0.2    | 0.2    | 0.2    |
| RUEmax    | Maximum radiation use efficiency ( $\text{g MJ}^{-1}$ )    | 3      | 3      | 3      | 3      | 3      | 3      |
| maxOMDgv  | Maximum OMD for GV                                         | 0.9    | 0.9    | 0.9    | 0.9    | 0.9    | 0.9    |
| minOMDgv  | Minimum OMD for GV                                         | 0.75   | 0.75   | 0.75   | 0.75   | 0.75   | 0.75   |
| maxOMDgr  | Maximum OMD for GR                                         | 0.9    | 0.9    | 0.9    | 0.9    | 0.9    | 0.9    |
| minOMDgr  | Minimum OMD for GR                                         | 0.65   | 0.65   | 0.65   | 0.65   | 0.65   | 0.65   |
| meanOMDdv | Mean OMD for DV                                            | 0.4    | 0.4    | 0.4    | 0.4    | 0.4    | 0.4    |
| meanOMDdr | Mean OMD for DR                                            | 0.2    | 0.2    | 0.2    | 0.2    | 0.2    | 0.2    |

GV: green vegetative compartment; DV: dry vegetative compartment; GR: green reproductive compartment; DR: dry reproductive compartment; OMD: organic matter digestibility.

**Table S6.** Functional type-specific parameters of ModVege [25].

| Functional type | Parameter  | Description                                          | Block 1 |         |         | Block 2 |         |         |
|-----------------|------------|------------------------------------------------------|---------|---------|---------|---------|---------|---------|
|                 |            |                                                      | NPK     | Null    | Ab      | NPK     | Null    | Ab      |
| A               | ST1        | Onset of the reproductive phase (°C-d)               | 600     | 600     | 600     | 600     | 600     | 600     |
|                 | ST2        | End of the reproductive phase (°C-d)                 | 1200    | 1200    | 1200    | 1200    | 1200    | 1200    |
|                 | IN         | Soil nutritional index                               | 0.85    | 0.85    | 0.85    | 0.85    | 0.85    | 0.85    |
|                 | WHC        | Water holding capacity (mm)                          | 200     | 200     | 200     | 200     | 200     | 200     |
|                 | MinSEA     | Maximum value of the winter growth factor            | 0.8     | 0.8     | 0.8     | 0.8     | 0.8     | 0.8     |
|                 | MaxSEA     | Maximum value of the summer growth factor            | 1.2     | 1.2     | 1.2     | 1.2     | 1.2     | 1.2     |
|                 | W_GV       | Initial biomass of GV (kg ha <sup>-1</sup> )         | 1219.96 | 1219.96 | 1219.96 | 1219.96 | 1219.96 | 1219.96 |
|                 | SLA        | Specific leaf area (m <sup>2</sup> g <sup>-1</sup> ) | 0.044   | 0.044   | 0.044   | 0.044   | 0.044   | 0.044   |
|                 | LLS        | Leaf lifespan (°C-d)                                 | 500     | 500     | 500     | 500     | 500     | 500     |
|                 | W_GR       | Biomass of GR (kg ha <sup>-1</sup> )                 | 151.13  | 151.13  | 151.13  | 151.13  | 151.13  | 151.13  |
|                 | W_DV       | Biomass of DV (kg ha <sup>-1</sup> )                 | 645.6   | 645.6   | 645.6   | 645.6   | 645.6   | 645.6   |
|                 | W_DR       | Biomass of DR (kg ha <sup>-1</sup> )                 | 62.35   | 62.35   | 62.35   | 62.35   | 62.35   | 62.35   |
|                 | Ini_AGE_GV | Initial value of age (°C-d)                          | 267.76  | 267.76  | 267.76  | 267.76  | 267.76  | 267.76  |
|                 | Ini_AGE_GR | Initial value of age (°C-d)                          | 2006.55 | 2006.55 | 2006.55 | 2006.55 | 2006.55 | 2006.55 |
|                 | Ini_AGE_DV | Initial value of age °C-d)                           | 288.35  | 288.35  | 288.35  | 288.35  | 288.35  | 288.35  |

|   |            |                                                      |         |         |         |         |         |         |
|---|------------|------------------------------------------------------|---------|---------|---------|---------|---------|---------|
|   | Ini_AGE_DR | Initial value of age (°C-d)                          | 1461.04 | 1461.04 | 1461.04 | 1461.04 | 1461.04 | 1461.04 |
|   | ST1        | Onset of the reproductive phase (°C-d)               | 700     | 700     | 700     | 700     | 700     | 700     |
|   | ST2        | End of the reproductive phase (°C-d)                 | 1350    | 1350    | 1350    | 1350    | 1350    | 1350    |
|   | IN         | Soil nutritional index                               | 0.90    | 0.90    | 0.90    | 0.90    | 0.90    | 0.90    |
|   | WHC        | Water holding capacity (mm)                          | 100     | 100     | 100     | 100     | 100     | 100     |
|   | MinSEA     | Maximum value of the winter growth factor            | 0.7     | 0.7     | 0.7     | 0.7     | 0.7     | 0.7     |
|   | MaxSEA     | Maximum value of the summer growth factor            | 1.3     | 1.3     | 1.3     | 1.3     | 1.3     | 1.3     |
| B | W_GV       | Initial biomass of GV (kg ha <sup>-1</sup> )         | 1070.33 | 1070.33 | 1070.33 | 1070.33 | 1070.33 | 1070.33 |
|   | SLA        | Specific leaf area (m <sup>2</sup> g <sup>-1</sup> ) | 0.025   | 0.025   | 0.025   | 0.025   | 0.025   | 0.025   |
|   | LLS        | Leaf lifespan (°C-d)                                 | 800     | 800     | 800     | 800     | 800     | 800     |
|   | W_GR       | Biomass of GR (kg ha <sup>-1</sup> )                 | 218.08  | 218.08  | 218.08  | 218.08  | 218.08  | 218.08  |
|   | W_DV       | Biomass of DV (kg ha <sup>-1</sup> )                 | 493.70  | 493.70  | 493.70  | 493.70  | 493.70  | 493.70  |
|   | W_DR       | Biomass of DR (kg ha <sup>-1</sup> )                 | 80.64   | 80.64   | 80.64   | 80.64   | 80.64   | 80.64   |
|   | Ini_AGE_GV | Initial value of age (°C-d)                          | 310.79  | 310.79  | 310.79  | 310.79  | 310.79  | 310.79  |
|   | Ini_AGE_GR | Initial value of age (°C-d)                          | 1936.77 | 1936.77 | 1936.77 | 1936.77 | 1936.77 | 1936.77 |
|   | Ini_AGE_DV | Initial value of age °C-d)                           | 330.92  | 330.92  | 330.92  | 330.92  | 330.92  | 330.92  |
|   | Ini_AGE_DR | Initial value of age (°C-d)                          | 1339.93 | 1339.93 | 1339.93 | 1339.93 | 1339.93 | 1339.93 |
| b | ST1        | Onset of the reproductive phase (°C-d)               | 600     | 600     | 600     | 600     | 600     | 600     |

|            |                                                      |         |         |         |         |         |         |
|------------|------------------------------------------------------|---------|---------|---------|---------|---------|---------|
| ST2        | End of the reproductive phase (°C-d)                 | 1100    | 1100    | 1100    | 1100    | 1100    | 1100    |
| IN         | Soil nutritional index                               | 0.9     | 0.9     | 0.9     | 0.9     | 0.9     | 0.9     |
| WHC        | Water holding capacity (mm)                          | 100     | 100     | 100     | 100     | 100     | 100     |
| MinSEA     | Maximum value of the winter growth factor            | 0.7     | 0.7     | 0.7     | 0.7     | 0.7     | 0.7     |
| MaxSEA     | Maximum value of the summer growth factor            | 1.3     | 1.3     | 1.3     | 1.3     | 1.3     | 1.3     |
| W_GV       | Initial biomass of GV (kg ha <sup>-1</sup> )         | 1364.65 | 1364.65 | 1364.65 | 1364.65 | 1364.65 | 1364.65 |
| SLA        | Specific leaf area (m <sup>2</sup> g <sup>-1</sup> ) | 0.035   | 0.035   | 0.035   | 0.035   | 0.035   | 0.035   |
| LLS        | Leaf lifespan (°C-d)                                 | 830     | 830     | 830     | 830     | 830     | 830     |
| W_GR       | Biomass of GR (kg ha <sup>-1</sup> )                 | 155.16  | 155.16  | 155.16  | 155.16  | 155.16  | 155.16  |
| W_DV       | Biomass of DV (kg ha <sup>-1</sup> )                 | 588.85  | 588.85  | 588.85  | 588.85  | 588.85  | 588.85  |
| W_DR       | Biomass of DR (kg ha <sup>-1</sup> )                 | 63.29   | 63.29   | 63.29   | 63.29   | 63.29   | 63.29   |
| Ini_AGE_GV | Initial value of age (°C-d)                          | 300.77  | 300.77  | 300.77  | 300.77  | 300.77  | 300.77  |
| Ini_AGE_GR | Initial value of age (°C-d)                          | 2012.35 | 2012.35 | 2012.35 | 2012.35 | 2012.35 | 2012.35 |
| Ini_AGE_DV | Initial value of age °C-d)                           | 316.61  | 316.61  | 316.61  | 316.61  | 316.61  | 316.61  |
| Ini_AGE_DR | Initial value of age (°C-d)                          | 1477.65 | 1477.65 | 1477.65 | 1477.65 | 1477.65 | 1477.65 |

\* A: *Alopecurus pratensis*, *Holcus lanatus*, *Lolium multiflorum*, *Lolium perenne*; B: *Arrhenatherum elatius*, *Dactylis glomerata*, *Festuca arundinacea*, *Poa pratensis*; b: *Elymus repens*, *Trisetum flavescens*, *Poa trivialis*. Source: [24].

**Table S7.** ModVege parameters specific to each plant species (forbs and legume), either from the calibration performed in this study (Cal), based on published ranges, or from the published literature (Lit). Sources: [20, 25, 60–62].

| Parameter  | Description                                          | Reference | Forbs                       |                       |                        |                             | Legume               |                         |
|------------|------------------------------------------------------|-----------|-----------------------------|-----------------------|------------------------|-----------------------------|----------------------|-------------------------|
|            |                                                      |           | <i>Achillea millefolium</i> | <i>Galium aparine</i> | <i>Stellaria media</i> | <i>Taraxacum officinale</i> | <i>Urtica dioica</i> | <i>Trifolium repens</i> |
| ST1        | Onset of the reproductive phase (°C-d)               | Cal       | 850                         | 800                   | 600                    | 600                         | 800                  | 800                     |
| ST2        | End of the reproductive phase (°C-d)                 | Cal       | 1550                        | 1200                  | 1100                   | 1100                        | 1200                 | 1200                    |
| IN         | Soil nutritional index                               | Cal       | 0.8                         | 0.9                   | 0.9                    | 0.9                         | 0.9                  | 0.9                     |
| WHC        | Water holding capacity (mm)                          | Cal       | 100                         | 100                   | 100                    | 100                         | 100                  | 100                     |
| MinSEA     | Maximum value of the winter growth factor            | Cal       | 0.7                         | 0.7                   | 0.7                    | 0.7                         | 0.7                  | 0.7                     |
| MaxSEA     | Maximum value of the summer growth factor            | Cal       | 1.3                         | 1.3                   | 1.3                    | 1.3                         | 1.3                  | 1.3                     |
| W_GV       | Initial biomass of GV (kg ha <sup>-1</sup> )         | Cal       | 1000                        | 1144                  | 1000                   | 1000                        | 1144                 | 1000                    |
| SLA        | Specific leaf area (m <sup>2</sup> g <sup>-1</sup> ) | Cal/Lit   | 0.017                       | 0.048                 | 0.030                  | 0.048                       | 0.023                | 0.018                   |
| LLS        | Leaf lifespan (°C-d)                                 | Cal       | 800                         | 800                   | 800                    | 800                         | 800                  | 800                     |
| W_GR       | Biomass of GR (kg ha <sup>-1</sup> )                 | Cal       | 150                         | 196                   | 150                    | 150                         | 196                  | 150                     |
| W_DV       | Biomass of DV (kg ha <sup>-1</sup> )                 | Cal       | 500                         | 535                   | 500                    | 500                         | 535                  | 500                     |
| W_DR       | Biomass of DR (kg ha <sup>-1</sup> )                 | Cal       | 60                          | 75                    | 60                     | 60                          | 75                   | 60                      |
| Ini_AGE_GV | Initial value of age (°C-d)                          | Cal       | 357.28                      | 302                   | 357.28                 | 357.28                      | 302                  | 357.28                  |
| Ini_AGE_GR | Initial value of age (°C-d)                          | Cal       | 1783.87                     | 1961                  | 1783.87                | 1783.87                     | 1961                 | 1783.87                 |
| Ini_AGE_DV | Initial value of age (°C-d)                          | Cal       | 376.45                      | 321                   | 376.45                 | 376.45                      | 321                  | 376.45                  |

---

|            |                                |     |         |      |         |         |      |         |
|------------|--------------------------------|-----|---------|------|---------|---------|------|---------|
| Ini_AGE_DR | Initial value<br>of age (°C-d) | Cal | 1209.46 | 1383 | 1209.46 | 1209.46 | 1383 | 1209.46 |
|------------|--------------------------------|-----|---------|------|---------|---------|------|---------|

---

**Table S8.** CoSMo parameters common to all functional types or species (Cal: calibrated; Def: set to default value).

| Parameters      | Description                                              | Reference | Block 1 |      |     | Block 2 |      |     |
|-----------------|----------------------------------------------------------|-----------|---------|------|-----|---------|------|-----|
|                 |                                                          |           | NPK     | Null | Ab  | NPK     | Null | Ab  |
| IncOpt          | Optimal leaf nitrogen concentration (g m <sup>-2</sup> ) | Cal       | 2       | 2    | 2   | 2       | 2    | 2   |
| AnimalLiking    | Liking of grazing animals for a plant type or species    | Def       | 0       | 0    | 0   | 0       | 0    | 0   |
| RestartCapacity | Capacity to restart after mowing                         | Cal       | 0.8     | 0.8  | 0.8 | 0.8     | 0.8  | 0.8 |



**Table S9.** Functional type specific CoSMo parameters (calibrated).

| Functional type | Parameter             | Description                                               | Block 1 |       |       | Block 2 |       |       |
|-----------------|-----------------------|-----------------------------------------------------------|---------|-------|-------|---------|-------|-------|
|                 |                       |                                                           | NPK     | Null  | Ab    | NPK     | Null  | Ab    |
| A               | Legume                | Legume species                                            | False   | False | False | False   | False | False |
|                 | rgrLAI <sub>max</sub> | Maximum LAI increase (m <sup>2</sup> d <sup>-1</sup> )    | 0.52    | 0.52  | 0.52  | 0.52    | 0.52  | 0.52  |
|                 | DT                    | Drought tolerance                                         | 0.59    | 0.64  | 0.68  | 0.64    | 0.58  | 0.75  |
|                 | LAI <sub>max</sub>    | Maximum leaf area index (m <sup>2</sup> m <sup>-2</sup> ) | 12.04   | 12.04 | 12.04 | 12.04   | 12.04 | 12.04 |
|                 | MaxHeight             | Maximum canopy height (m)                                 | 1.5     | 1.5   | 1.5   | 1.5     | 1.5   | 1.5   |
|                 | MaxRootingDepth       | Maximum rooting depth (m)                                 | 1       | 1     | 1     | 1       | 1     | 1     |
|                 | Shoot/root ratio      | Shoot-root ratio                                          | 0.67    | 0.67  | 0.67  | 0.67    | 0.67  | 0.67  |
| B               | Legume                | Legume species                                            | False   | False | False | False   | False | False |
|                 | rgrLAI <sub>max</sub> | Maximum LAI increase (m <sup>2</sup> d <sup>-1</sup> )    | 0.39    | 0.39  | 0.39  | 0.39    | 0.39  | 0.39  |
|                 | DT                    | Drought tolerance                                         | 0.63    | 0.63  | 0.60  | 0.62    | 0.61  | 0.58  |
|                 | LAI <sub>max</sub>    | Maximum leaf area index (m <sup>2</sup> m <sup>-2</sup> ) | 9.12    | 9.12  | 9.12  | 9.12    | 9.12  | 9.12  |
|                 | MaxHeight             | Maximum canopy height (m)                                 | 1.64    | 1.64  | 1.64  | 1.64    | 1.64  | 1.64  |
|                 | MaxRootingDepth       | Maximum rooting depth (m)                                 | 1.4     | 1.4   | 1.4   | 1.3     | 1.3   | 1.3   |
|                 | Shoot/root ratio      | Shoot-root ratio                                          | 0.85    | 0.85  | 0.85  | 0.79    | 0.79  | 0.79  |
| b               | Legume                | Legume species                                            | False   | False | False | False   | False | False |

---

|                       |                                                                    |       |       |       |       |       |       |
|-----------------------|--------------------------------------------------------------------|-------|-------|-------|-------|-------|-------|
| rgrLAI <sub>max</sub> | Maximum<br>LAI<br>increase<br>(m <sup>2</sup> d <sup>-1</sup> )    | 0.55  | 0.55  | 0.55  | 0.55  | 0.55  | 0.55  |
| DT                    | Drought<br>tolerance                                               | 0.64  | 0.60  | 0.62  | 0.58  | 0.57  | 0.60  |
| LAI <sub>max</sub>    | Maximum<br>leaf area<br>index (m <sup>2</sup><br>m <sup>-2</sup> ) | 12.77 | 12.77 | 12.77 | 12.77 | 12.77 | 12.77 |
| MaxHeight             | Maximum<br>canopy<br>height (m)                                    | 1.74  | 1.74  | 1.74  | 1.74  | 1.74  | 1.74  |
| MaxRootingDepth       | Maximum<br>rooting<br>depth (m)                                    | 1     | 1     | 1     | 1     | 1     | 1     |
| Shoot/root ratio      | Shoot-root<br>ratio                                                | 0.57  | 0.57  | 0.57  | 0.57  | 0.57  | 0.57  |

---

**Table S10.** CoSMo parameters specific to each plant species (calibrated).

| Taxonomic group    | Species                      | Parameter             | Description                                               | Reference | Block 1 |      |       | Block 2 |       |       |
|--------------------|------------------------------|-----------------------|-----------------------------------------------------------|-----------|---------|------|-------|---------|-------|-------|
|                    |                              |                       |                                                           |           | NPK     | Null | Ab    | NPK     | Null  | Ab    |
| Grass              | <i>Alopecurus pratensis</i>  | Legume                | Legume species                                            | -         | -       | -    | False | False   | False | False |
|                    |                              | rgrLAI <sub>max</sub> | Maximum LAI increase (m <sup>2</sup> d <sup>-1</sup> )    | Cal       | -       | -    | 0.52  | 0.52    | 0.52  | 0.52  |
|                    |                              | DT                    | Drought tolerance                                         | Cal       | -       | -    | 0.70  | 0.54    | 0.55  | 0.73  |
|                    |                              | LAI <sub>max</sub>    | Maximum leaf area index (m <sup>2</sup> m <sup>-2</sup> ) | Cal       | -       | -    | 5     | 5       | 5     | 5     |
|                    |                              | MaxHeight             | Maximum canopy height (m)                                 | Cal       | -       | -    | 1.1   | 1.1     | 1.1   | 1.1   |
|                    |                              | MaxRootingDepth       | Maximum rooting depth (m)                                 | Cal       | -       | -    | 1.2   | 1.2     | 1.2   | 1.2   |
|                    |                              | Shoot/root ratio      | Shoot-root ratio                                          | Cal       | -       | -    | 1.09  | 1.09    | 1.09  | 1.09  |
|                    | <i>Arrhenatherum elatius</i> | Legume                | Legume species                                            | -         | -       | -    | False | -       | -     | False |
|                    |                              | rgrLAI <sub>max</sub> | Maximum LAI increase (m <sup>2</sup> d <sup>-1</sup> )    | Cal       | -       | -    | 0.39  | -       | -     | 0.39  |
|                    |                              | DT                    | Drought tolerance                                         | Cal       | -       | -    | 0.50  | -       | -     | 0.40  |
|                    |                              | LAI <sub>max</sub>    | Maximum leaf area index (m <sup>2</sup> m <sup>-2</sup> ) | Cal       | -       | -    | 4.5   | -       | -     | 5     |
|                    |                              | MaxHeight             | Maximum canopy height (m)                                 | Cal       | -       | -    | 1.2   | -       | -     | 1.1   |
|                    |                              | MaxRootingDepth       | Maximum rooting depth (m)                                 | Cal       | -       | -    | 1.5   | -       | -     | 1.2   |
|                    |                              | Shoot/root ratio      | Shoot-root ratio                                          | Cal       | -       | -    | 1.25  | -       | -     | 1.09  |
| Dactylis glomerata | <i>Dactylis glomerata</i>    | Legume                | Legume species                                            | -         | -       | -    | False | -       | -     | -     |

|                            |                       |                                                           |     |       |       |       |   |   |       |
|----------------------------|-----------------------|-----------------------------------------------------------|-----|-------|-------|-------|---|---|-------|
| <i>Elymus repens</i>       | rgrLAI <sub>max</sub> | Maximum LAI increase (m <sup>2</sup> d <sup>-1</sup> )    | Cal | -     | -     | 0.39  | - | - | -     |
|                            | DT                    | Drought tolerance                                         | Cal | -     | -     | 0.73  | - | - | -     |
|                            | LAI <sub>max</sub>    | Maximum leaf area index (m <sup>2</sup> m <sup>-2</sup> ) | Cal | -     | -     | 5     | - | - | -     |
|                            | MaxHeight             | Maximum canopy height (m)                                 | Cal | -     | -     | 1.1   | - | - | -     |
|                            | MaxRootingDepth       | Maximum rooting depth (m)                                 | Cal | -     | -     | 1.1   | - | - | -     |
|                            | Shoot/root ratio      | Shoot-root ratio                                          | Cal | -     | -     | 1     | - | - | -     |
|                            | Legume                | Legume species                                            | -   | False | False | False | - | - | False |
|                            | rgrLAI <sub>max</sub> | Maximum LAI increase (m <sup>2</sup> d <sup>-1</sup> )    | Cal | 0.55  | 0.55  | 0.55  | - | - | 0.55  |
|                            | DT                    | Drought tolerance                                         | Cal | 0.65  | 0.60  | 0.82  | - | - | 0.80  |
|                            | LAI <sub>max</sub>    | Maximum leaf area index (m <sup>2</sup> m <sup>-2</sup> ) | Cal | 5     | 5     | 5     | - | - | 5     |
|                            | MaxHeight             | Maximum canopy height (m)                                 | Cal | 1     | 1     | 1     | - | - | 1     |
|                            | MaxRootingDepth       | Maximum rooting depth (m)                                 | Cal | 1     | 1     | 1     | - | - | 1     |
|                            | Shoot/root ratio      | Shoot-root ratio                                          | Cal | 1     | 1     | 1     | - | - | 1     |
|                            | Legume                | Legume species                                            | -   | False | False | False | - | - | False |
| <i>Festuca arundinacea</i> | rgrLAI <sub>max</sub> | Maximum LAI increase (m <sup>2</sup> d <sup>-1</sup> )    | Cal | 0.39  | 0.39  | 0.39  | - | - | 0.39  |
|                            | DT                    | Drought tolerance                                         | Cal | 0.65  | 0.61  | 0.80  | - | - | 0.62  |
|                            | LAI <sub>max</sub>    | Maximum leaf area                                         | Cal | 5     | 5     | 5     | - | - | 5     |
|                            |                       |                                                           |     |       |       |       |   |   |       |

|                           |                       |                                                           |     |       |       |       |       |   |   |
|---------------------------|-----------------------|-----------------------------------------------------------|-----|-------|-------|-------|-------|---|---|
| <i>Holcus lanatus</i>     |                       | index (m <sup>2</sup> m <sup>-2</sup> )                   |     |       |       |       |       |   |   |
|                           | MaxHeight             | Maximum canopy height (m)                                 | Cal | 1     | 1     | 1     | -     | - | 1 |
|                           | MaxRootingDepth       | Maximum rooting depth (m)                                 | Cal | 1     | 1     | 1     | -     | - | 1 |
|                           | Shoot/root ratio      | Shoot-root ratio                                          | Cal | 1     | 1     | 1     | -     | - | 1 |
|                           | Legume                | Legume species                                            | -   | -     | False | False | False | - | - |
|                           | rgrLAI <sub>max</sub> | Maximum LAI increase (m <sup>2</sup> d <sup>-1</sup> )    | Cal | -     | 0.52  | 0.52  | 0.52  | - | - |
|                           | DT                    | Drought tolerance                                         | Cal | -     | 0.84  | 0.80  | 0.87  | - | - |
|                           | LAI <sub>max</sub>    | Maximum leaf area index (m <sup>2</sup> m <sup>-2</sup> ) | Cal | -     | 6     | 6     | 6     | - | - |
|                           | MaxHeight             | Maximum canopy height (m)                                 | Cal | -     | 0.4   | 0.4   | 0.4   | - | - |
|                           | MaxRootingDepth       | Maximum rooting depth (m)                                 | Cal | -     | 1     | 1     | 1     | - | - |
| <i>Lolium multiflorum</i> | Shoot/root ratio      | Shoot-root ratio                                          | Cal | -     | 2.5   | 2.5   | 2.5   | - | - |
|                           | Legume                | Legume species                                            | -   | False | -     | -     | -     | - | - |
|                           | rgrLAI <sub>max</sub> | Maximum LAI increase (m <sup>2</sup> d <sup>-1</sup> )    | Cal | 0.52  | -     | -     | -     | - | - |
|                           | DT                    | Drought tolerance                                         | Cal | 0.73  | -     | -     | -     | - | - |
|                           | LAI <sub>max</sub>    | Maximum leaf area index (m <sup>2</sup> m <sup>-2</sup> ) | Cal | 5     | -     | -     | -     | - | - |
|                           | MaxHeight             | Maximum canopy height (m)                                 | Cal | 0.8   | -     | -     | -     | - | - |
|                           | MaxRootingDepth       | Maximum rooting depth (m)                                 | Cal | 1     | -     | -     | -     | - | - |

|                       |                       |                                                           |     |       |       |       |       |       |       |
|-----------------------|-----------------------|-----------------------------------------------------------|-----|-------|-------|-------|-------|-------|-------|
| <i>Lolium perenne</i> | Shoot/root ratio      | Shoot-root ratio                                          | Cal | 1.25  | -     | -     | -     | -     | -     |
|                       | Legume                | Legume species                                            | -   | -     | -     | -     | False | False | -     |
|                       | rgrLAI <sub>max</sub> | Maximum LAI increase (m <sup>2</sup> d <sup>-1</sup> )    | Cal | -     | -     | -     | 0.52  | 0.52  | -     |
|                       | DT                    | Drought tolerance                                         | Cal | -     | -     | -     | 0.65  | 0.72  | -     |
|                       | LAI <sub>max</sub>    | Maximum leaf area index (m <sup>2</sup> m <sup>-2</sup> ) | Cal | -     | -     | -     | 5     | 5     | -     |
|                       | MaxHeight             | Maximum canopy height (m)                                 | Cal | -     | -     | -     | 0.8   | 0.8   | -     |
|                       | MaxRootingDepth       | Maximum rooting depth (m)                                 | Cal | -     | -     | -     | 1     | 1     | -     |
|                       | Shoot/root ratio      | Shoot-root ratio                                          | Cal | -     | -     | -     | 1.25  | 1.25  | -     |
| <i>Poa pratensis</i>  | Legume                | Legume species                                            | -   | False | False | False | False | False | False |
|                       | rgrLAI <sub>max</sub> | Maximum LAI increase (m <sup>2</sup> d <sup>-1</sup> )    | Cal | 0.39  | 0.39  | 0.39  | 0.39  | 0.39  | 0.39  |
|                       | DT                    | Drought tolerance                                         | Cal | 0.63  | 0.60  | 0.82  | 0.62  | 0.63  | 0.79  |
|                       | LAI <sub>max</sub>    | Maximum leaf area index (m <sup>2</sup> m <sup>-2</sup> ) | Cal | 5.5   | 5     | 5     | 5     | 5     | 5     |
|                       | MaxHeight             | Maximum canopy height (m)                                 | Cal | 1     | 1     | 1     | 1     | 1     | 1     |
|                       | MaxRootingDepth       | Maximum rooting depth (m)                                 | Cal | 1     | 1     | 1     | 1     | 1     | 1     |
|                       | Shoot/root ratio      | Shoot-root ratio                                          | Cal | 1     | 1     | 1     | 1     | 1     | 1     |
|                       | Legume                | Legume species                                            | -   | -     | False | -     | -     | -     | -     |
| <i>Poa trivialis</i>  | rgrLAI <sub>max</sub> | Maximum LAI increase (m <sup>2</sup> d <sup>-1</sup> )    | Cal | -     | 0.55  | -     | -     | -     | -     |
|                       |                       |                                                           |     |       |       |       |       |       |       |

|        |                            |                       |                                                           |     |   |      |   |       |       |   |
|--------|----------------------------|-----------------------|-----------------------------------------------------------|-----|---|------|---|-------|-------|---|
| Legume | <i>Trisetum flavescens</i> | DT                    | Drought tolerance                                         | Cal | - | 0.72 | - | -     | -     | - |
|        |                            | LAI <sub>max</sub>    | Maximum leaf area index (m <sup>2</sup> m <sup>-2</sup> ) | Cal | - | 5    | - | -     | -     | - |
|        |                            | MaxHeight             | Maximum canopy height (m)                                 | Cal | - | 0.7  | - | -     | -     | - |
|        |                            | MaxRootingDepth       | Maximum rooting depth (m)                                 | Cal | - | 1    | - | -     | -     | - |
|        |                            | Shoot/root ratio      | Shoot-root ratio                                          | Cal | - | 1.43 | - | -     | -     | - |
|        |                            | Legume                | Legume species                                            | -   | - | -    | - | False | False | - |
|        |                            | rgrLAI <sub>max</sub> | Maximum LAI increase (m <sup>2</sup> d <sup>-1</sup> )    | Cal | - | -    | - | 0.55  | 0.55  | - |
|        |                            | DT                    | Drought tolerance                                         | Cal | - | -    | - | 0.68  | 0.68  | - |
|        |                            | LAI <sub>max</sub>    | Maximum leaf area index (m <sup>2</sup> m <sup>-2</sup> ) | Cal | - | -    | - | 5     | 5     | - |
|        |                            | MaxHeight             | Maximum canopy height (m)                                 | Cal | - | -    | - | 0.8   | 0.8   | - |
|        |                            | MaxRootingDepth       | Maximum rooting depth (m)                                 | Cal | - | -    | - | 1     | 1     | - |
|        |                            | Shoot/root ratio      | Shoot-root ratio                                          | Cal | - | -    | - | 1.25  | 1.25  | - |
|        | <i>Trifolium repens</i>    | Legume                | Legume species                                            | -   | - | True | - | -     | True  | - |
|        |                            | rgrLAI <sub>max</sub> | Maximum LAI increase (m <sup>2</sup> d <sup>-1</sup> )    | Cal | - | 0.5  | - | -     | 0.5   | - |
|        |                            | DT                    | Drought tolerance                                         | Cal | - | 0.76 | - | -     | 0.83  | - |
|        |                            | LAI <sub>max</sub>    | Maximum leaf area                                         | Cal | - | 6    | - | -     | 5     | - |

|      |                             |                       |                                                           |     |   |       |       |       |       |
|------|-----------------------------|-----------------------|-----------------------------------------------------------|-----|---|-------|-------|-------|-------|
| Forb | <i>Achillea millefolium</i> |                       | index (m <sup>2</sup> m <sup>-2</sup> )                   |     |   |       |       |       |       |
|      |                             | MaxHeight             | Maximum canopy height (m)                                 | Cal | - | 0.3   | -     | -     | 0.3   |
|      |                             | MaxRootingDepth       | Maximum rooting depth (m)                                 | Cal | - | 1.2   | -     | -     | 1.2   |
|      |                             | Shoot/root ratio      | Shoot-root ratio                                          | Cal | - | 4     | -     | -     | 4     |
|      |                             | Legume                | Legume species                                            | -   | - | False | -     | False | False |
|      |                             | rgrLAI <sub>max</sub> | Maximum LAI increase (m <sup>2</sup> d <sup>-1</sup> )    | Cal | - | 0.5   | -     | 0.5   | 0.5   |
|      |                             | DT                    | Drought tolerance                                         | Cal | - | 0.67  | -     | 0.65  | 0.67  |
|      | <i>Galium aparine</i>       | LAI <sub>max</sub>    | Maximum leaf area index (m <sup>2</sup> m <sup>-2</sup> ) | Cal | - | 5     | -     | 5     | 5     |
|      |                             | MaxHeight             | Maximum canopy height (m)                                 | Cal | - | 0.8   | -     | 0.8   | 0.8   |
|      |                             | MaxRootingDepth       | Maximum rooting depth (m)                                 | Cal | - | 1.1   | -     | 1.1   | 1.1   |
|      |                             | Shoot/root ratio      | Shoot-root ratio                                          | Cal | - | 1.38  | -     | 1.38  | 1.38  |
|      |                             | Legume                | Legume species                                            | -   | - | -     | False | -     | -     |
|      |                             | rgrLAI <sub>max</sub> | Maximum LAI increase (m <sup>2</sup> d <sup>-1</sup> )    | Cal | - | -     | 0.44  | -     | -     |
|      |                             | DT                    | Drought tolerance                                         | Cal | - | -     | 0.55  | -     | -     |
|      | <i>Galium aparine</i>       | LAI <sub>max</sub>    | Maximum leaf area index (m <sup>2</sup> m <sup>-2</sup> ) | Cal | - | -     | 6     | -     | -     |
|      |                             | MaxHeight             | Maximum canopy height (m)                                 | Cal | - | -     | 1.2   | -     | -     |
|      |                             | MaxRootingDepth       | Maximum rooting depth (m)                                 | Cal | - | -     | 1.2   | -     | -     |



|                             |                       |                                                           |     |       |       |       |       |       |       |
|-----------------------------|-----------------------|-----------------------------------------------------------|-----|-------|-------|-------|-------|-------|-------|
| <i>Stellaria media</i>      | Shoot/root ratio      | Shoot-root ratio                                          | Cal | -     | -     | 1     | -     | -     | -     |
|                             | Legume                | Legume species                                            | -   | False | -     | -     | False | -     | -     |
|                             | rgrLAI <sub>max</sub> | Maximum LAI increase (m <sup>2</sup> d <sup>-1</sup> )    | Cal | 0.4   | -     | -     | 0.4   | -     | -     |
|                             | DT                    | Drought tolerance                                         | Cal | 0.71  | -     | -     | 0.60  | -     | -     |
|                             | LAI <sub>max</sub>    | Maximum leaf area index (m <sup>2</sup> m <sup>-2</sup> ) | Cal | 5     | -     | -     | 5     | -     | -     |
|                             | MaxHeight             | Maximum canopy height (m)                                 | Cal | 0.8   | -     | -     | 0.8   | -     | -     |
|                             | MaxRootingDepth       | Maximum rooting depth (m)                                 | Cal | 1     | -     | -     | 1     | -     | -     |
|                             | Shoot/root ratio      | Shoot-root ratio                                          | Cal | 1.25  | -     | -     | 1.25  | -     | -     |
| <i>Taraxacum officinale</i> | Legume                | Legume species                                            | -   | False | False | -     | False | False | -     |
|                             | rgrLAI <sub>max</sub> | Maximum LAI increase (m <sup>2</sup> d <sup>-1</sup> )    | Cal | 0.5   | 0.5   | -     | 0.5   | 0.5   | -     |
|                             | DT                    | Drought tolerance                                         | Cal | 0.85  | 0.80  | -     | 0.83  | 0.80  | -     |
|                             | LAI <sub>max</sub>    | Maximum leaf area index (m <sup>2</sup> m <sup>-2</sup> ) | Cal | 6     | 6     | -     | 6     | 6     | -     |
|                             | MaxHeight             | Maximum canopy height (m)                                 | Cal | 0.4   | 0.4   | -     | 0.4   | 0.4   | -     |
|                             | MaxRootingDepth       | Maximum rooting depth (m)                                 | Cal | 1.2   | 1.2   | -     | 1.2   | 1.2   | -     |
|                             | Shoot/root ratio      | Shoot-root ratio                                          | Cal | 3     | 3     | -     | 3     | 3     | -     |
|                             | Legume                | Legume species                                            | -   | -     | -     | False | -     | -     | False |
| <i>Urtica dioica</i>        | rgrLAI <sub>max</sub> | Maximum LAI increase (m <sup>2</sup> d <sup>-1</sup> )    | Cal | -     | -     | 0.44  | -     | -     | 0.44  |

|                    |                                                           |     |   |   |      |   |   |      |
|--------------------|-----------------------------------------------------------|-----|---|---|------|---|---|------|
| DT                 | Drought tolerance                                         | Cal | - | - | 0.75 | - | - | 0.79 |
| LAI <sub>max</sub> | Maximum leaf area index (m <sup>2</sup> m <sup>-2</sup> ) | Cal | - | - | 6    | - | - | 6    |
| MaxHeight          | Maximum canopy height (m)                                 | Cal | - | - | 1    | - | - | 1    |
| MaxRootingDepth    | Maximum rooting depth (m)                                 | Cal | - | - | 1    | - | - | 1    |
| Shoot/root ratio   | Shoot-root ratio                                          | Cal | - | - | 1    | - | - | 1    |

## 6 Results

### 6.1 Performance metrics and scatterplots

**Table S11.** Performance metrics for the evaluation of alternative modelling solutions for the simulation of aboveground biomass. *R*=linear correlation coefficient; *RRMSE*: root mean square error; *RMAE*: root mean absolute error; *CRM*: coefficient of residual mass.

| Modelling solution      | Treatment | <i>R</i> | <i>RRMSE</i> (%) | <i>RMAE</i> (%) | <i>CRM</i> | Mean of observations (kg DM ha <sup>-1</sup> ) | Mean of simulations (kg DM ha <sup>-1</sup> ) |
|-------------------------|-----------|----------|------------------|-----------------|------------|------------------------------------------------|-----------------------------------------------|
| ModVege                 | Block 1   |          |                  |                 |            |                                                |                                               |
|                         | NPK       | 0.88     | 42.9             | 33.5            | -0.17      | 2871                                           | 3354                                          |
|                         | Null      | 0.72     | 125.1            | 82.9            | -0.69      | 1397                                           | 2363                                          |
|                         | Ab        | 0.34     | 39.5             | 31.4            | -0.03      | 5204                                           | 5381                                          |
|                         | Block 2   |          |                  |                 |            |                                                |                                               |
|                         | NPK       | 0.82     | 60.7             | 49.0            | -0.33      | 2448                                           | 3257                                          |
|                         | Null      | 0.82     | 120.0            | 87.9            | -0.86      | 1186                                           | 2211                                          |
|                         | Ab        | 0.45     | 42.2             | 36.4            | -0.11      | 4617                                           | 5141                                          |
| ModVege-CoSMo (FG)      | Block 1   |          |                  |                 |            |                                                |                                               |
|                         | NPK       | 0.87     | 44.3             | 35.3            | -0.18      | 2871                                           | 3377                                          |
|                         | Null      | 0.87     | 106.4            | 78.1            | -0.77      | 1397                                           | 2470                                          |
|                         | Ab        | 0.33     | 40.7             | 33.2            | 0.12       | 5204                                           | 4539                                          |
|                         | Block 2   |          |                  |                 |            |                                                |                                               |
|                         | NPK       | 0.82     | 64.7             | 53.4            | -0.39      | 2448                                           | 3409                                          |
|                         | Null      | 0.82     | 120.0            | 87.9            | -0.86      | 1186                                           | 2210                                          |
|                         | Ab        | 0.44     | 40.6             | 33.7            | 0.07       | 4617                                           | 4303                                          |
| ModVege-CoSMo (Species) | Block 1   |          |                  |                 |            |                                                |                                               |
|                         | NPK       | 0.89     | 43.5             | 34.3            | -0.23      | 2871                                           | 3534                                          |
|                         | Null      | 0.87     | 103.3            | 74.6            | -0.72      | 1397                                           | 2401                                          |
|                         | Ab        | 0.34     | 40.6             | 33.5            | 0.12       | 5204                                           | 4575                                          |
|                         | Block 2   |          |                  |                 |            |                                                |                                               |
|                         | NPK       | 0.84     | 63.8             | 52.2            | -0.39      | 2448                                           | 3415                                          |
|                         | Null      | 0.84     | 129.3            | 97.6            | -0.97      | 1186                                           | 2336                                          |
|                         | Ab        | 0.44     | 40.7             | 33.7            | 0.07       | 4617                                           | 4290                                          |

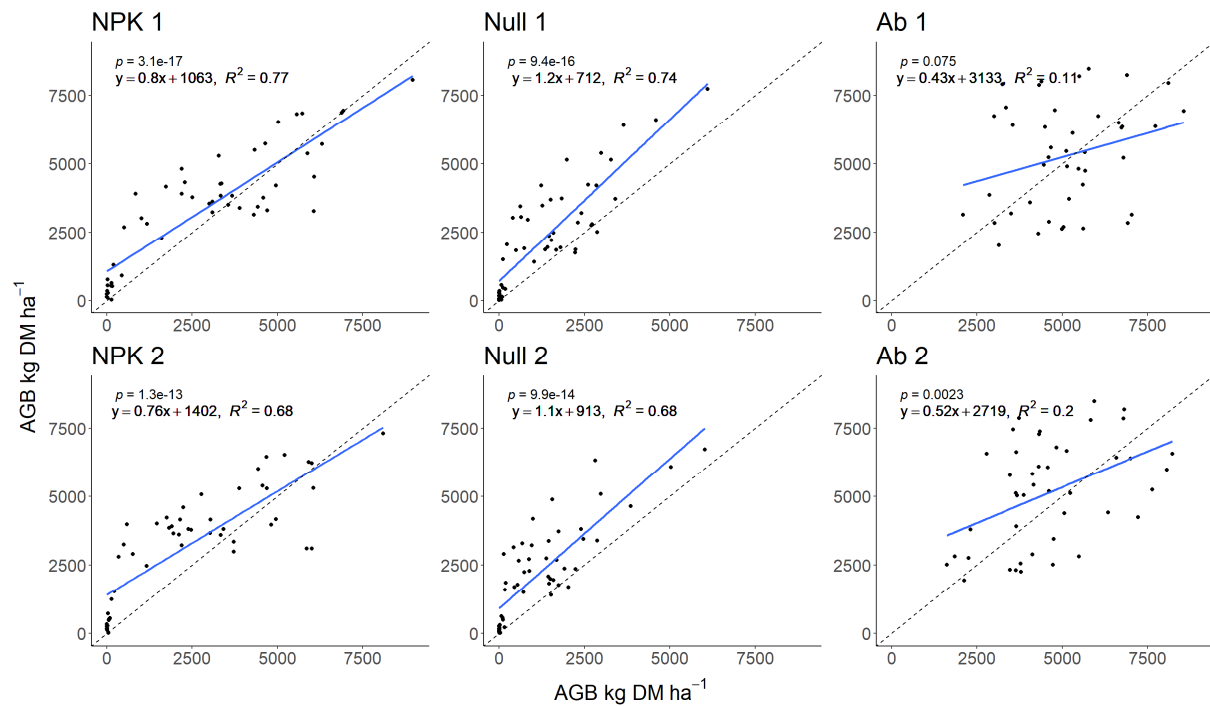

**Figure S3.** ModVege: comparison of simulated and observed aboveground biomass (AGB) in three treatments (NPK: fertilised; Null: unfertilised; Ab: abandoned) and two blocks (1, 2).

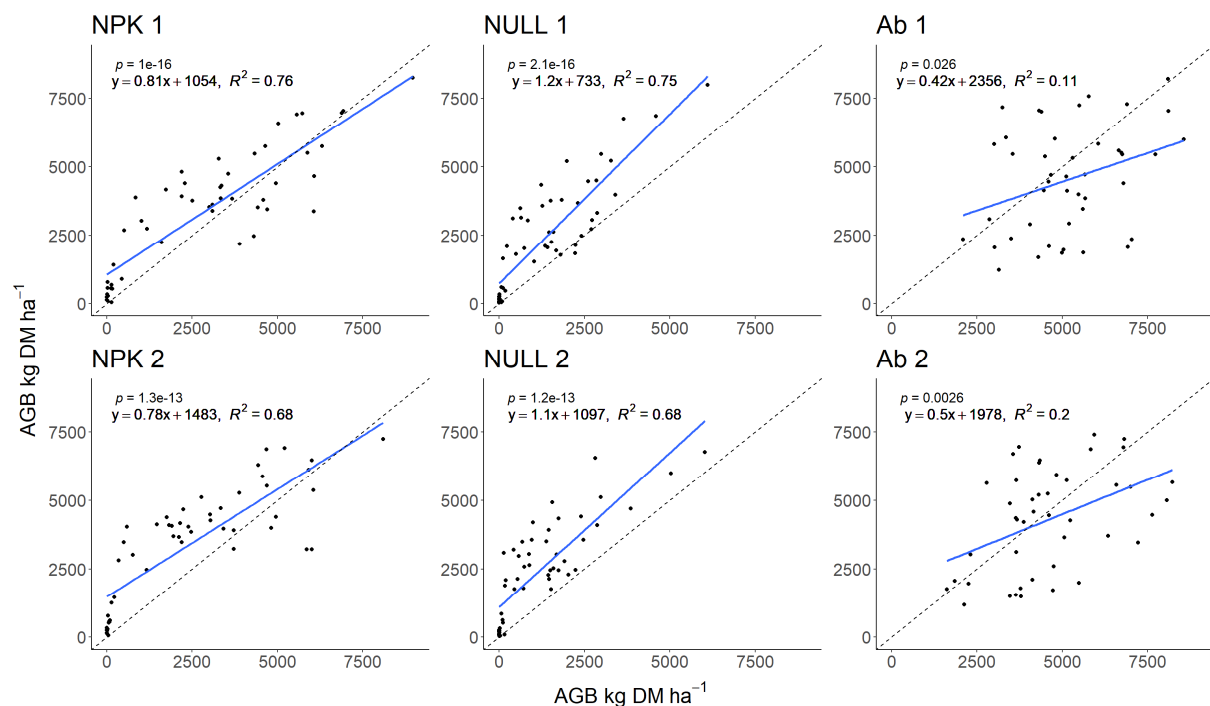

**Figure S4.** ModVege-CoSMo (plant functional groups): comparison of simulated and observed aboveground biomass (AGB) in three treatments (NPK: fertilised; Null: unfertilised; Ab: abandoned) and two blocks (1, 2).

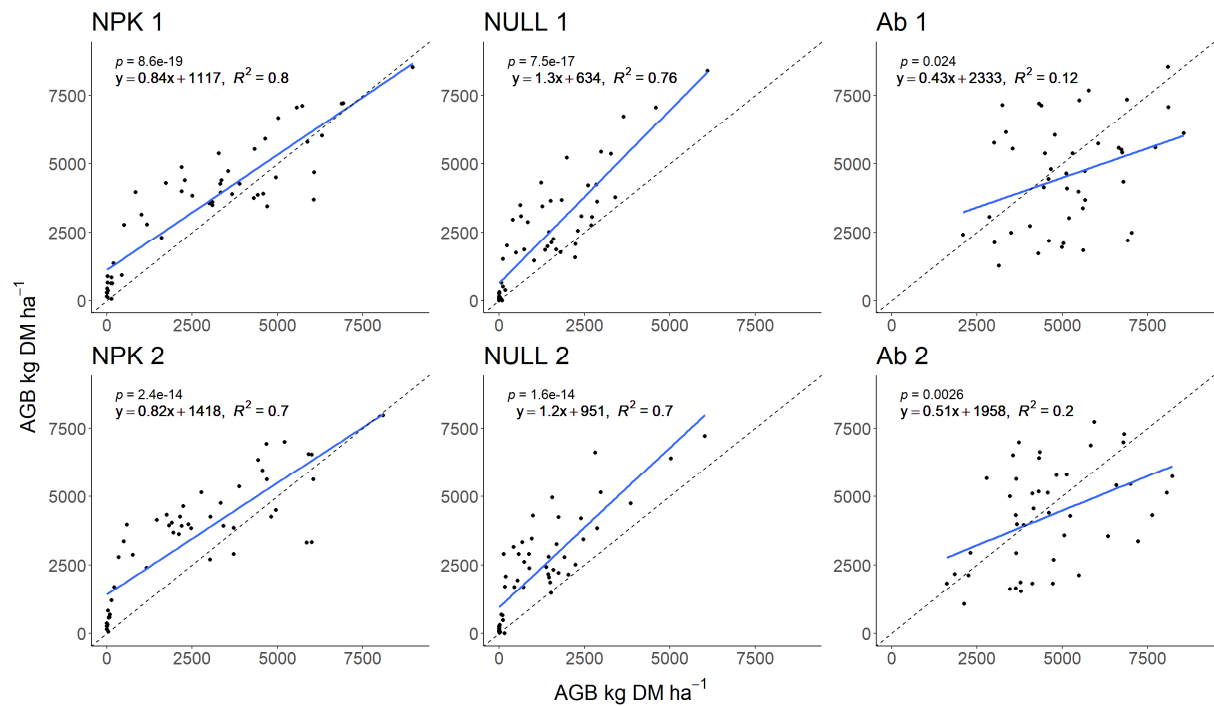

**Figure S5.** ModVege-CoSMo (plant species): comparison of simulated and observed aboveground biomass (AGB) in three treatments (NPK: fertilised; Null: unfertilised; Ab: abandoned) and two blocks (1, 2).

**Table S12.** Performance metrics for the evaluation of ModVege-CoSMo for the simulation of the relative abundance of plant (grass) functional types. *R*=linear correlation coefficient; *RRMSE*: root mean square error; *RMAE*: root mean absolute error; *CRM*: coefficient of residual mass.

| Functional typology | Treatment | <i>R</i> | <i>RRMSE</i> (%) | <i>RMAE</i> (%) | <i>CRM</i> | Mean of observations | Mean of simulations |
|---------------------|-----------|----------|------------------|-----------------|------------|----------------------|---------------------|
| A                   | Block 1   |          |                  |                 |            |                      |                     |
|                     | NPK       | 0.53     | 28.7             | 22.0            | -0.01      | 0.07                 | 0.07                |
|                     | Null      | 0.78     | 15.7             | 11.9            | 0.03       | 0.21                 | 0.20                |
|                     | Ab        | 0.76     | 16.5             | 13.8            | -0.05      | 0.24                 | 0.25                |
|                     | Block 2   |          |                  |                 |            |                      |                     |
|                     | NPK       | 0.89     | 9.0              | 6.5             | -0.03      | 0.47                 | 0.49                |
|                     | Null      | 0.89     | 15.3             | 10.5            | 0.05       | 0.40                 | 0.37                |
|                     | Ab        | 0.04     | 15.7             | 13.1            | -0.08      | 0.59                 | 0.64                |
| B                   | Block 1   |          |                  |                 |            |                      |                     |
|                     | NPK       | 0.21     | 13.8             | 7.9             | 0.03       | 0.45                 | 0.43                |
|                     | Null      | 0.49     | 12.2             | 9.4             | -0.02      | 0.49                 | 0.50                |
|                     | Ab        | 0.04     | 14.8             | 10.8            | -0.04      | 0.35                 | 0.36                |
|                     | Block 2   |          |                  |                 |            |                      |                     |
|                     | NPK       | 0.31     | 16.3             | 10.6            | 0.03       | 0.33                 | 0.32                |
|                     | Null      | 0.48     | 23.8             | 18.9            | -0.12      | 0.32                 | 0.36                |
|                     | Ab        | 0.26     | 35.4             | 30.4            | 0.18       | 0.27                 | 0.22                |
| b                   | Block 1   |          |                  |                 |            |                      |                     |
|                     | NPK       | 0.53     | 13.5             | 7.2             | -0.03      | 0.49                 | 0.50                |
|                     | Null      | 0.12     | 16.1             | 13.7            | 0.02       | 0.30                 | 0.29                |
|                     | Ab        | 0.70     | 12.5             | 9.4             | 0.06       | 0.42                 | 0.39                |
|                     | Block 2   |          |                  |                 |            |                      |                     |
|                     | NPK       | 0.95     | 9.2              | 7.0             | 0.02       | 0.20                 | 0.20                |
|                     | Null      | 0.82     | 14.4             | 9.3             | 0.03       | 0.28                 | 0.27                |
|                     | Ab        | 0.28     | 36.1             | 32.0            | -0.30      | 0.11                 | 0.14                |
| Community           | Block 1   |          |                  |                 |            |                      |                     |
|                     | NPK       | 0.96     | 16.8             | 10.0            | 0.00       | 0.33                 | 0.33                |
|                     | Null      | 0.93     | 15.9             | 12.6            | 0.00       | 0.33                 | 0.33                |
|                     | Ab        | 0.85     | 14.4             | 10.9            | 0.00       | 0.33                 | 0.33                |
|                     | Block 2   |          |                  |                 |            |                      |                     |
|                     | NPK       | 0.95     | 12.8             | 8.9             | 0.00       | 0.33                 | 0.33                |
|                     | Null      | 0.74     | 21.0             | 14.9            | 0.00       | 0.33                 | 0.33                |
|                     | Ab        | 0.93     | 24.7             | 19.7            | 0.00       | 0.33                 | 0.33                |

**Table S13.** Performance metrics for the evaluation of ModVege-CoSMo for the simulation of the relative abundance of plant species. *R*=linear correlation coefficient; *RRMSE*: root mean square error; *RMAE*: root mean absolute error; *CRM*: coefficient of residual mass.

| Performance metric | Treatment | Grasses                     |                              |                           |                      |                            |                       |                           |                       |                      |                      |                            |      | Legumes | Forbs                   |                             |                       |                        |                             | Community |                      |
|--------------------|-----------|-----------------------------|------------------------------|---------------------------|----------------------|----------------------------|-----------------------|---------------------------|-----------------------|----------------------|----------------------|----------------------------|------|---------|-------------------------|-----------------------------|-----------------------|------------------------|-----------------------------|-----------|----------------------|
|                    |           | <i>Alopecurus pratensis</i> | <i>Arrhenatherum elatius</i> | <i>Dactylis glomerata</i> | <i>Elymus repens</i> | <i>Festuca arundinacea</i> | <i>Holcus lanatus</i> | <i>Lolium multiflorum</i> | <i>Lolium perenne</i> | <i>Poa pratensis</i> | <i>Poa trivialis</i> | <i>Trisetum flavescens</i> | Mena |         | <i>Trifolium repens</i> | <i>Achillea millefolium</i> | <i>Galium aparine</i> | <i>Stellaria media</i> | <i>Taraxacum officinale</i> |           | <i>Urtica dioica</i> |
| R                  | Block 1   |                             |                              |                           |                      |                            |                       |                           |                       |                      |                      |                            |      |         |                         |                             |                       |                        |                             |           |                      |
|                    | NPK       | -                           | -                            | -                         | 0.27                 | 0.32                       | -                     | 0.42                      | -                     | 0.23                 | -                    | -                          | 0.89 | -       | -                       | -                           | 0.38                  | 0.85                   | -                           | 0.91      | 0.88                 |
|                    | Null      | -                           | -                            | -                         | 0.32                 | 0.58                       | 0.92                  | -                         | -                     | 0.16                 | 0.05                 | -                          | 0.61 | 0.90    | 0.54                    | -                           | -                     | 0.80                   | -                           | 0.92      | 0.62                 |
|                    | Ab        | 0.50                        | 0.87                         | 0.76                      | 0.86                 | 0.91                       | -                     | -                         | -                     | 0.76                 | -                    | -                          | 0.91 | -       | -                       | 0.73                        | -                     | -                      | 0.57                        | 0.64      | 0.89                 |
|                    | Block 2   |                             |                              |                           |                      |                            |                       |                           |                       |                      |                      |                            |      |         |                         |                             |                       |                        |                             |           |                      |
|                    | NPK       | 0.52                        | -                            | -                         | -                    | -                          | 0.37                  | -                         | 0.90                  | 0.53                 | -                    | 0.80                       | 0.86 | -       | 0.35                    | -                           | 0.27                  | 0.74                   | -                           | 0.83      | 0.83                 |
| RRMSE (%)          | Null      | 0.65                        | -                            | -                         | -                    | 0.69                       | -                     | -                         | 0.28                  | 0.67                 | -                    | 0.04                       | 0.71 | 0.38    | 0.11                    | -                           | -                     | 0.60                   | -                           | 0.85      | 0.53                 |
|                    | Ab        | 0.11                        | 0.44                         | -                         | 0.15                 | -                          | -                     | -                         | -                     | 0.48                 | -                    | -                          | 0.91 | -       | -                       | -                           | -                     | -                      | 0.82                        | 0.82      | 0.87                 |
|                    | Block 1   |                             |                              |                           |                      |                            |                       |                           |                       |                      |                      |                            |      |         |                         |                             |                       |                        |                             |           |                      |
|                    | NPK       | -                           | -                            | -                         | 15.5                 | 38.0                       | -                     | 54.5                      | -                     | 26.6                 | -                    | -                          | 27.1 | -       | -                       | -                           | 1344                  | 16.2                   | -                           | 36.7      | 30.1                 |
|                    | Null      | -                           | -                            | -                         | 50.5                 | 51.2                       | 44.7                  | -                         | -                     | 45.5                 | 75.7                 | -                          | 42.8 | 62.2    | 84.8                    | -                           | -                     | 12.4                   | -                           | 30.2      | 52.2                 |
|                    | Ab        | 35.6                        | 46.3                         | 80.0                      | 11.4                 | 35.7                       | -                     | -                         | -                     | 23.6                 | -                    | -                          | 36.6 | -       | -                       | 1424                        | -                     | -                      | 84.3                        | 116.4     | 42.2                 |

|                          |         | NPK   | 28.4  | -    | -     | -    | -     | 37.5 | -     | 34.2  | 21.2 | -    | 41.2  | 33.3 | -     | 63.3  | -     | 114.7 | 31.1  | -     | 51.3 | 37.5 |
|--------------------------|---------|-------|-------|------|-------|------|-------|------|-------|-------|------|------|-------|------|-------|-------|-------|-------|-------|-------|------|------|
|                          |         | Null  | 38.6  | -    | -     | -    | 56.2  | -    | -     | 24.1  | 24.9 | -    | 36.4  | 33.3 | 76.5  | 36.4  | -     | -     | 22.8  | -     | 27.3 | 27.9 |
|                          |         | Ab    | 12.4  | 65.9 | -     | 61.1 | -     | -    | -     | -     | 36.2 | -    | -     | 40.2 | -     | -     | -     | -     | -     | 56.5  | 56.5 | 46.0 |
| RMAE (%)                 | Block 1 |       |       |      |       |      |       |      |       |       |      |      |       |      |       |       |       |       |       |       |      |      |
|                          | NPK     | -     | -     | -    | 11.8  | 25.9 |       | 37.1 |       | 20.9  | -    | -    | 19.8  | -    | -     | -     | 1250  | 12.6  | -     | 31.1  | 23.2 |      |
|                          | Null    | -     | -     | -    | 40.3  | 39.8 | 37.7  | -    | -     | 39.6  | 62.5 | -    | 42.8  | 49.3 | 75.1  | -     | -     | 9.8   | -     | 24.5  | 38.8 |      |
|                          | Ab      | 26.7  | 32.7  | 52.7 | 8.5   | 25.8 | -     | -    | -     | 17.8  | -    | -    | 21.4  | -    | -     | 112.9 |       | -     | 72.5  | 92.5  | 28.4 |      |
|                          | Block 2 |       |       |      |       |      |       |      |       |       |      |      |       |      |       |       |       |       |       |       |      |      |
|                          | NPK     | 24.0  | -     | -    | -     | -    | 31.6  | -    | 28.5  | 16.9  | -    | 36.2 | 24.9  | -    | 51.5  | -     | 86.8  | 24.1  | -     | 39.8  | 29.5 |      |
|                          | Null    | 34.1  | -     | -    | -     | 36.1 | -     | -    | 18.9  | 17.1  | -    | 27.4 | 24.8  | 62.1 | 27.0  | -     | -     | 18.0  | -     | 20.4  | 20.3 |      |
|                          | Ab      | 8.0   | 60.9  | -    | 45.9  | -    | -     | -    | 28.0  | -     | -    | 25.6 | -     | -    | -     | -     | -     | -     | 50.1  | 50.1  | 28.5 |      |
| CRM                      | Block 1 |       |       |      |       |      |       |      |       |       |      |      |       |      |       |       |       |       |       |       |      |      |
|                          | NPK     | -     | -     | -    | 0.00  | 0.24 | -     | 0.26 | -     | -0.18 | -    | -    | 0.04  | -    | -     | -     | -0.82 | 0.06  | -     | -0.08 | 0.00 |      |
|                          | Null    | -     | -     | -    | 0.09  | 0.14 | -0.08 | -    | -     | -0.26 | 0.21 | -    | 0.00  | 0.19 | -0.65 | -     | -     | 0.00  | -     | -0.13 | 0.00 |      |
|                          | Ab      | 0.23  | -0.18 | 0.36 | 0.06  | 0.15 | -     | -    | -     | -0.13 | -    | -    | 0.07  | -    | -     | -0.92 |       | -     | -0.20 | -0.56 | 0.00 |      |
|                          | Block 2 |       |       |      |       |      |       |      |       |       |      |      |       |      |       |       |       |       |       |       |      |      |
|                          | NPK     | 0.19  | -     | -    | -     | -    | 0.00  | -    | 0.00  | -0.03 | -    | 0.06 | 0.05  | -    | -0.48 | -     | 0.87  | -0.20 | -     | -0.11 | 0.00 |      |
|                          | Null    | -0.18 | -     | -    | -     | 0.23 | -     | -    | -0.07 | -0.08 | -    | 0.09 | -0.03 | 0.06 | -0.15 | -     | -     | 0.10  | -     | 0.03  | 0.00 |      |
|                          | Ab      | -0.03 | 0.82  | -    | -0.45 | -    | -     | -    | -     | 0.04  | -    | -    | 0.05  | -    | -     | -     | -     | -     | -0.03 | -0.03 | 0.00 |      |
| Mean/sum of observations | Block 1 |       |       |      |       |      |       |      |       |       |      |      |       |      |       |       |       |       |       |       |      |      |
|                          | NPK     | -     | -     | -    | 0.31  | 0.11 | -     | 0.09 | -     | 0.19  | -    | -    | 0.70  | -    | -     | -     | 0.05  | 0.25  | -     | 0.30  | 1.00 |      |
|                          | Null    | -     | -     | -    | 0.07  | 0.13 | 0.07  | -    | -     | 0.17  | 0.08 | -    | 0.45  | 0.19 | 0.06  | -     | -     | 0.22  | -     | 0.28  | 1.00 |      |
|                          | Ab      | 0.17  | 0.05  | 0.05 | 0.35  | 0.08 | -     | -    | -     | 0.20  | -    | -    | 0.90  | -    | -     | 0.05  |       | -     | 0.05  | 0.10  | 1.00 |      |
|                          | Block 2 |       |       |      |       |      |       |      |       |       |      |      |       |      |       |       |       |       |       |       |      |      |
|                          | NPK     | 0.23  | -     | -    | -     | -    | 0.10  | -    | 0.07  | 0.21  | -    | 0.08 | 0.69  | -    | 0.07  | -     | 0.05  | 0.19  | -     | 0.31  | 1.00 |      |
|                          | Null    | 0.11  | -     | -    | -     | 0.07 | -     | -    | 0.13  | 0.18  | -    | 0.12 | 0.61  | 0.15 | 0.07  | -     | -     | 0.18  | -     | 0.25  | 1.00 |      |
|                          | Ab      | 0.46  | 0.09  | -    | 0.07  | -    | 0.07  | -    | -     | 0.18  | -    | -    | 0.87  | -    | -     | -     | -     | -     | 0.14  | 0.14  | 1.00 |      |
| Mean/sum of simulation   | Block 1 |       |       |      |       |      |       |      |       |       |      |      |       |      |       |       |       |       |       |       |      |      |
|                          | NPK     | -     | -     | -    | 0.31  | 0.09 | -     | 0.07 | -     | 0.22  | -    | -    | 0.69  | -    | -     | -     | 0.09  | 0.23  | -     | 0.32  | 1.00 |      |
|                          | Null    | -     | -     | -    | 0.06  | 0.11 | 0.07  | -    | -     | 0.22  | 0.06 | -    | 0.45  | 0.15 | 0.11  | -     | -     | 0.22  | -     | 0.33  | 1.00 |      |
|                          | Ab      | 0.13  | 0.06  | 0.03 | 0.33  | 0.06 | -     | -    | -     | 0.23  | -    | -    | 0.84  | -    | -     | 0.10  |       | -     | 0.06  | 0.16  | 1.00 |      |



| Block 2 |      |      |   |      |      |      |   |      |      |   |      |      |      |      |   |      |      |      |      |      |
|---------|------|------|---|------|------|------|---|------|------|---|------|------|------|------|---|------|------|------|------|------|
| NPK     | 0.23 | -    | - | -    | -    | 0.08 | - | 0.07 | 0.21 | - | 0.10 | 0.64 | -    | 0.07 | - | 0.05 | 0.19 | -    | 0.31 | 1.00 |
| Null    | 0.13 | -    | - | -    | 0.05 | -    | - | 0.14 | 0.19 | - | 0.11 | 0.62 | 0.14 | 0.08 | - | -    | 0.16 | -    | 0.24 | 1.00 |
| Ab      | 0.48 | 0.09 | - | 0.10 | -    | 0.02 | - | -    | 0.17 | - | -    | 0.86 | -    | -    | - | -    | -    | 0.15 | 0.15 | 1.00 |

## 6.2 Changes in relative abundances

### 6.2.1 Plant functional types

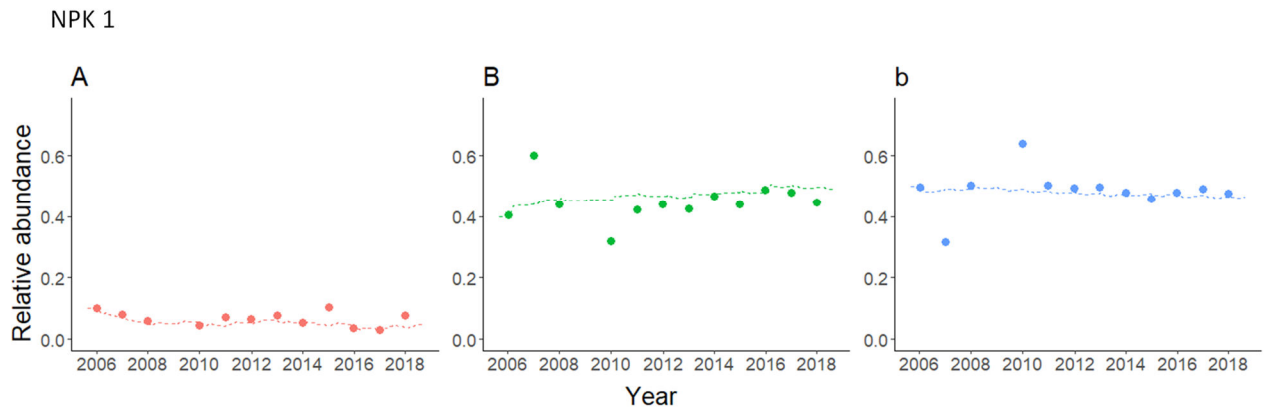

**Figure S5.** Observed (dots) and ModVege-CoSMo simulated (lines) fluctuations in the relative abundance of plant (grass) functional types in the treatment NPK (fertilised) of block 1.

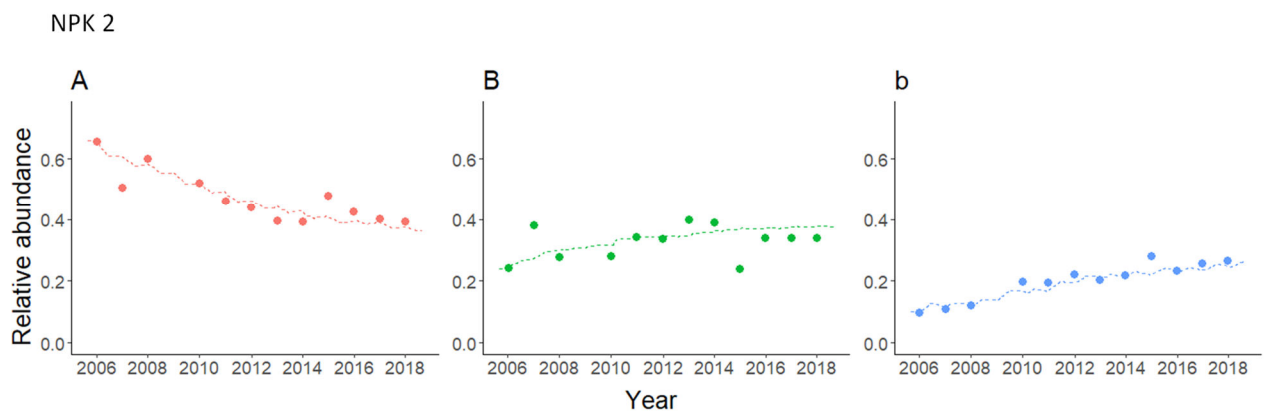

**Figure S6.** Observed (dots) and ModVege-CoSMo simulated (lines) fluctuations in the relative abundance of plant (grass) functional types in the treatment NPK (fertilised) of block 2.

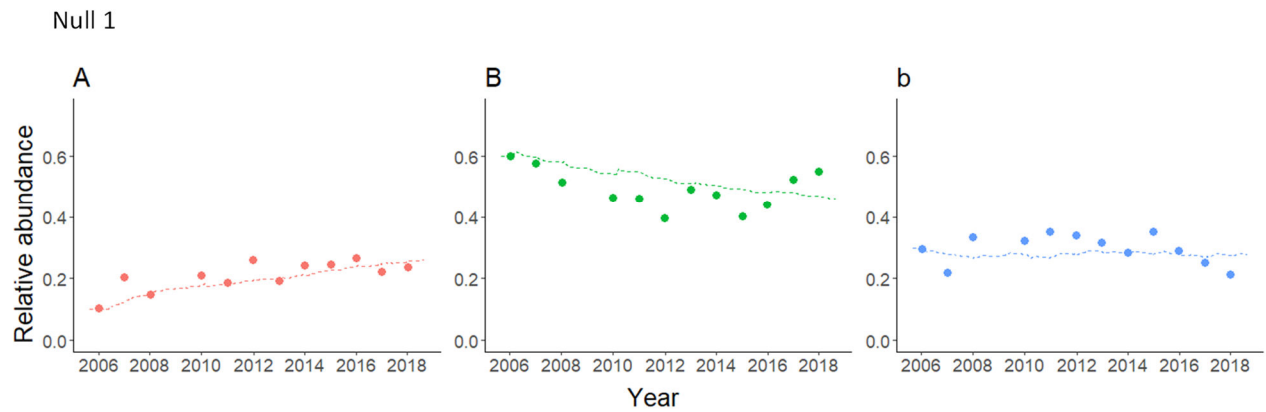

**Figure S7.** Observed (dots) and ModVege-CoSMo simulated (lines) fluctuations in the relative abundance of plant (grass) functional types in the treatment Null (unfertilised) of block 1.

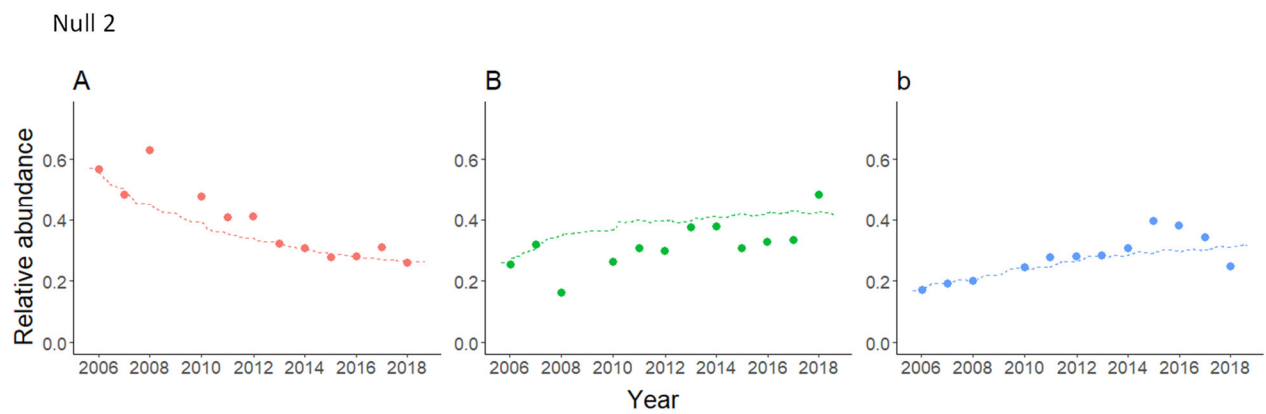

**Figure S8.** Observed (dots) and ModVege-CoSMo simulated (lines) fluctuations in the relative abundance of plant (grass) functional types in the treatment Null (unfertilised) of block 2.

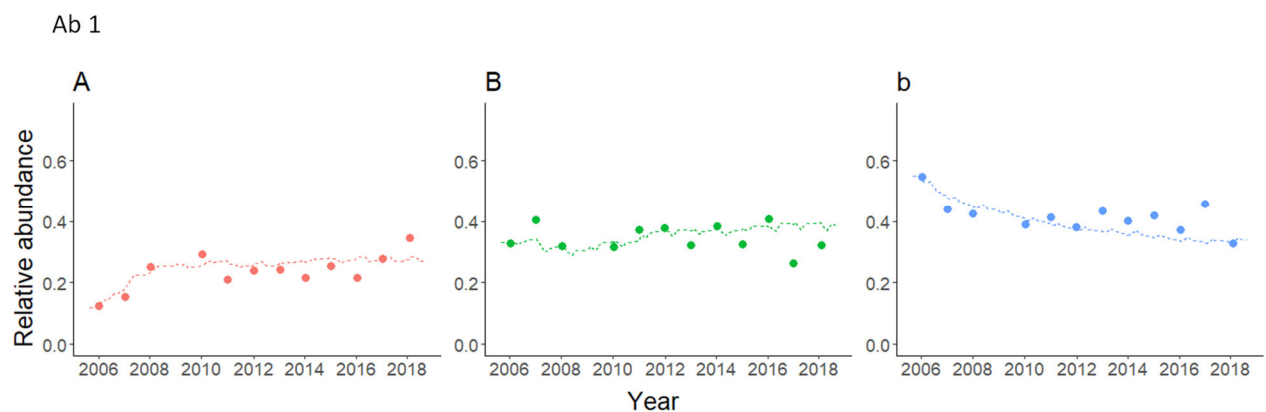

**Figure S9.** Observed (dots) and ModVege-CoSMo simulated (lines) fluctuations in the relative abundance of plant (grass) functional types in the treatment Ab (abandoned) of block 1.

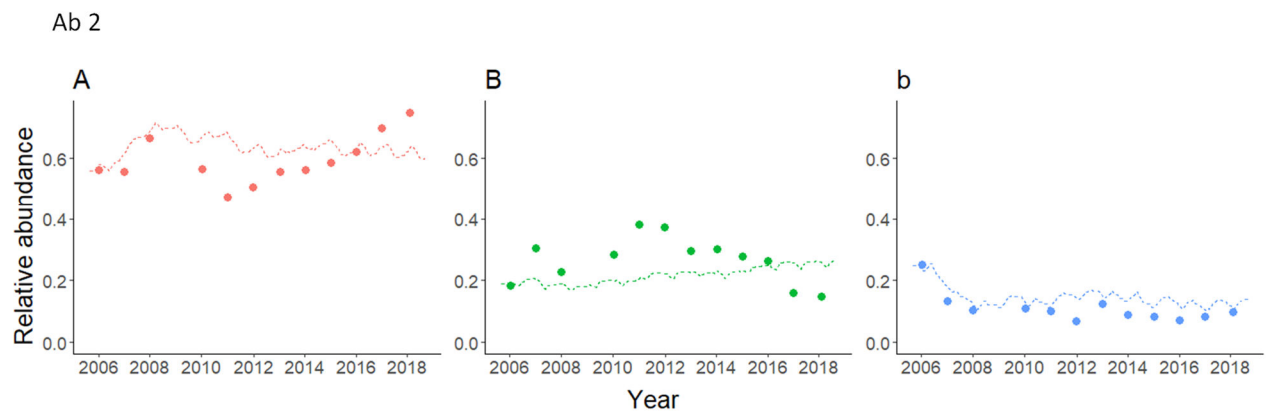

**Figure S10.** Observed (dots) and ModVege-CoSMo simulated (lines) fluctuations in the relative abundance of plant (grass) functional types in the treatment Ab (abandoned) of block 2.

## 6.2.2 Plant species

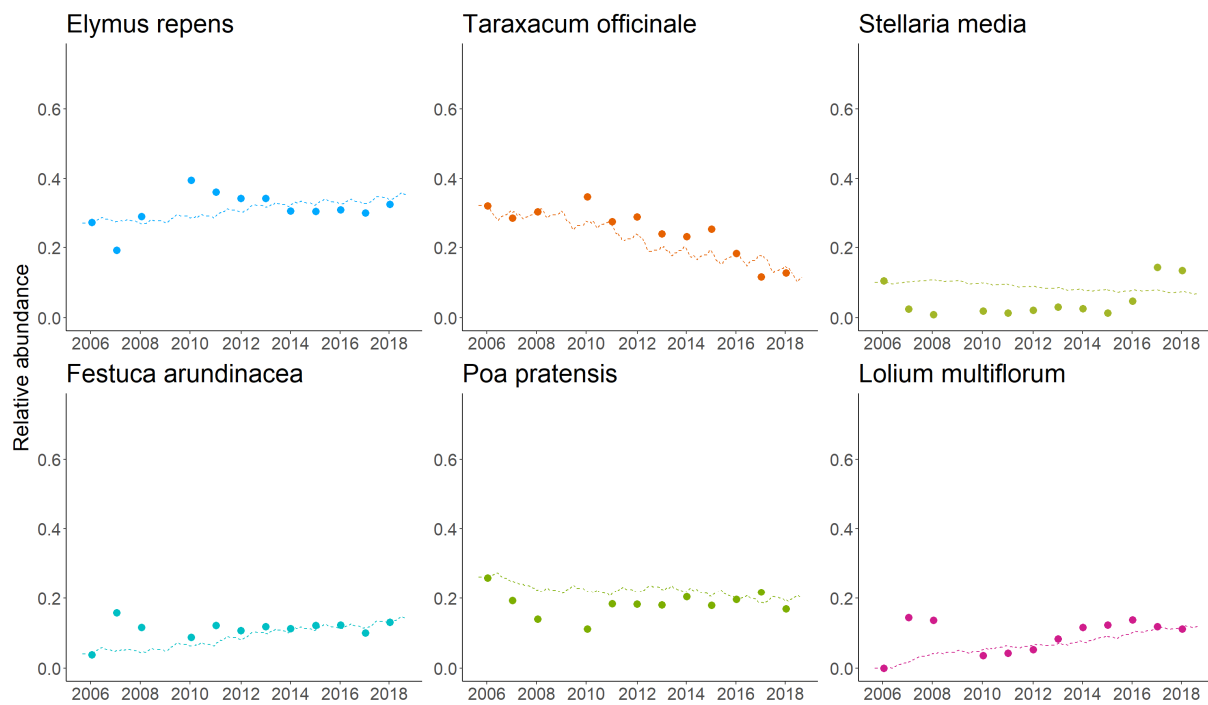

**Figure S11.** Observed (dots) and ModVege-CoSMo simulated (lines) fluctuations in the relative abundance of plant species in the treatment NPK (fertilised) of block 1.

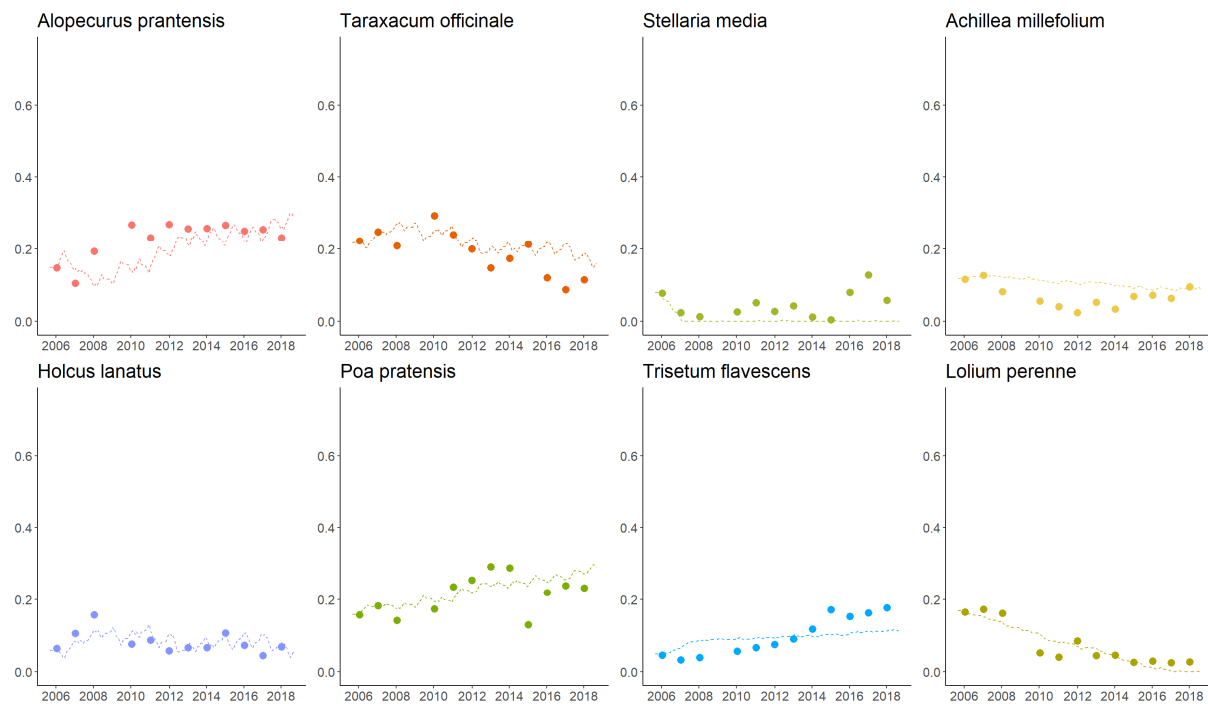

**Figure S12.** Observed (dots) and ModVege-CoSMo simulated (lines) fluctuations in the relative abundance of plant species in the treatment NPK (fertilised) of block 2.

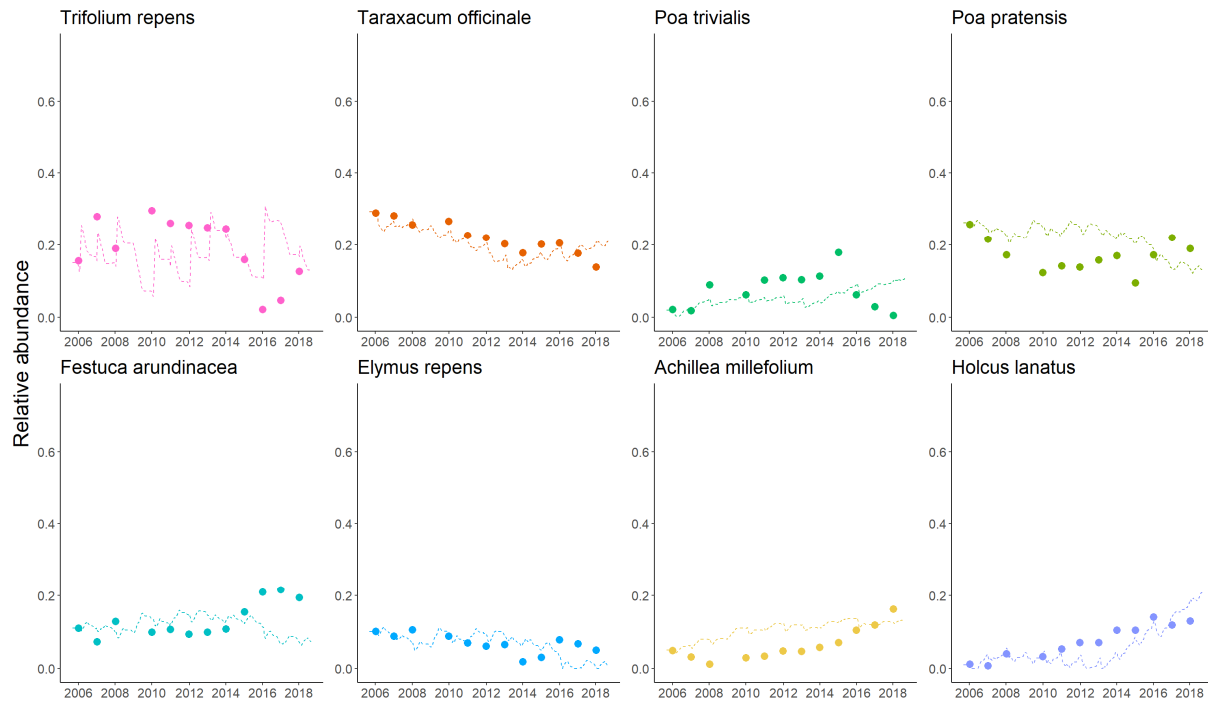

**Figure S13.** Observed (dots) and ModVege-CoSMo simulated (lines) fluctuations in the relative abundance of plant species in the treatment Null (unfertilised) of block 1.

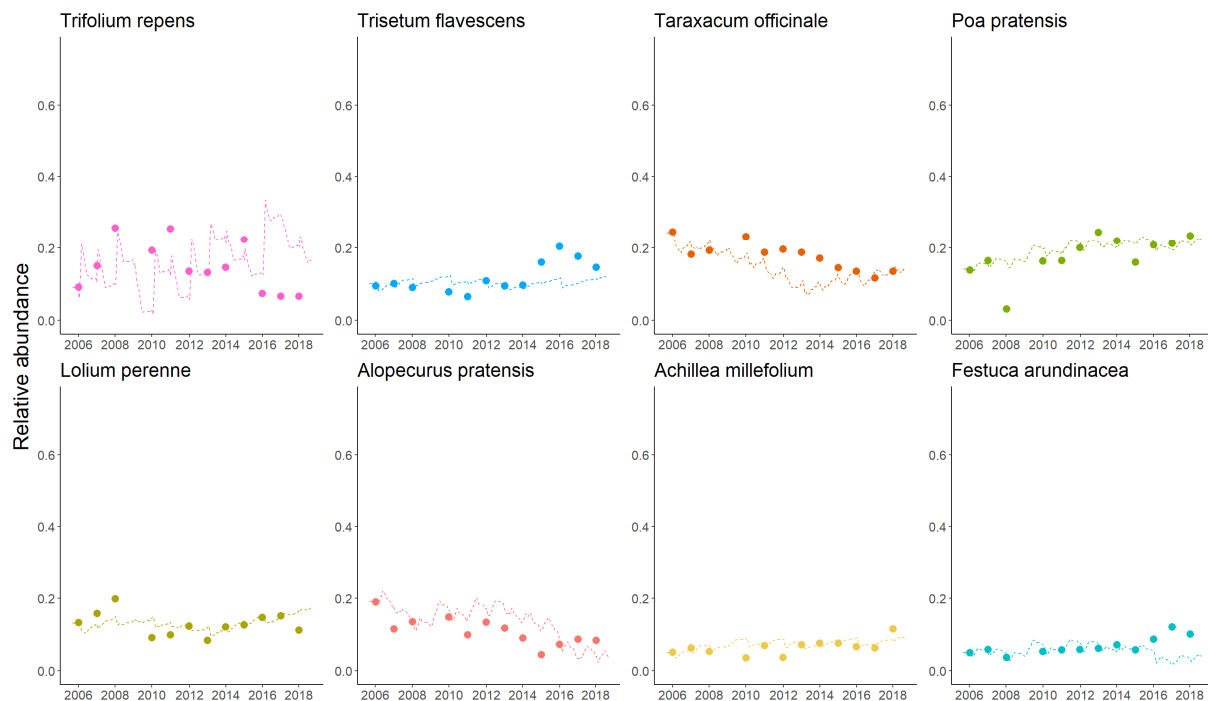

**Figure S14.** Observed (dots) and ModVege-CoSMo simulated (lines) fluctuations in the relative abundance of plant species in the treatment Null (unfertilised) of block 2.

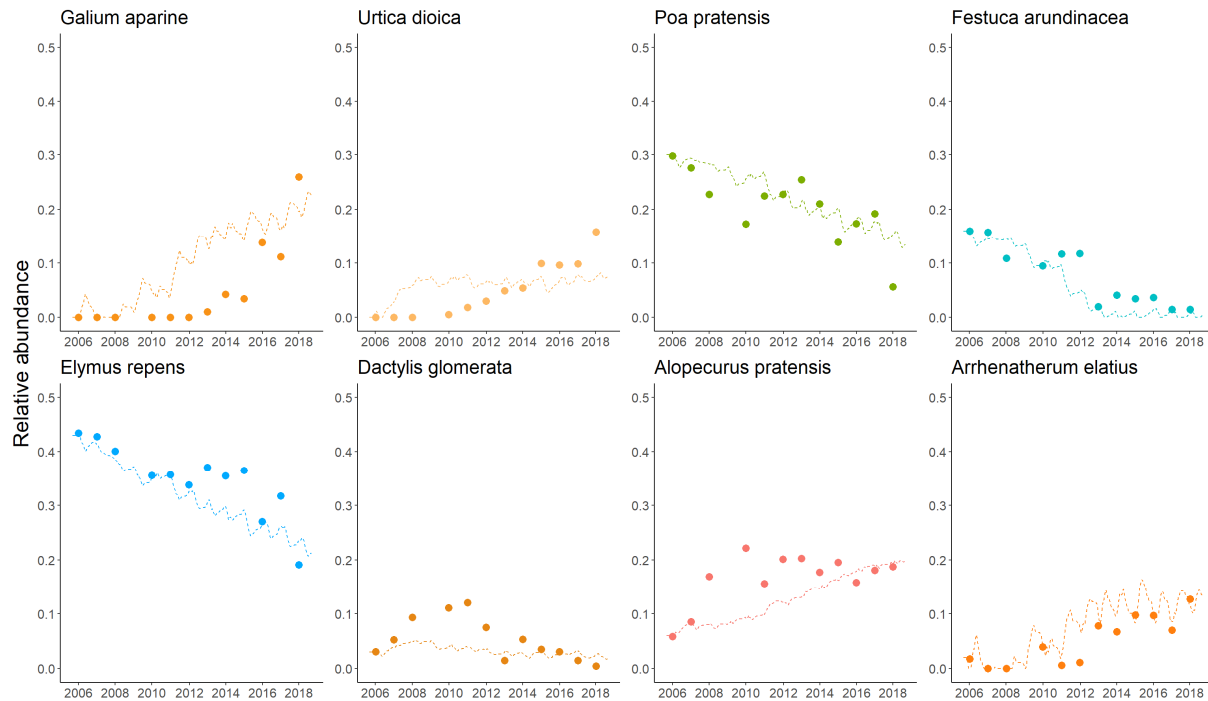

**Figure S15.** Observed (dots) and ModVege-CoSMo simulated (lines) fluctuations in the relative abundance of plant species in the treatment Ab (abandoned) of block 1.

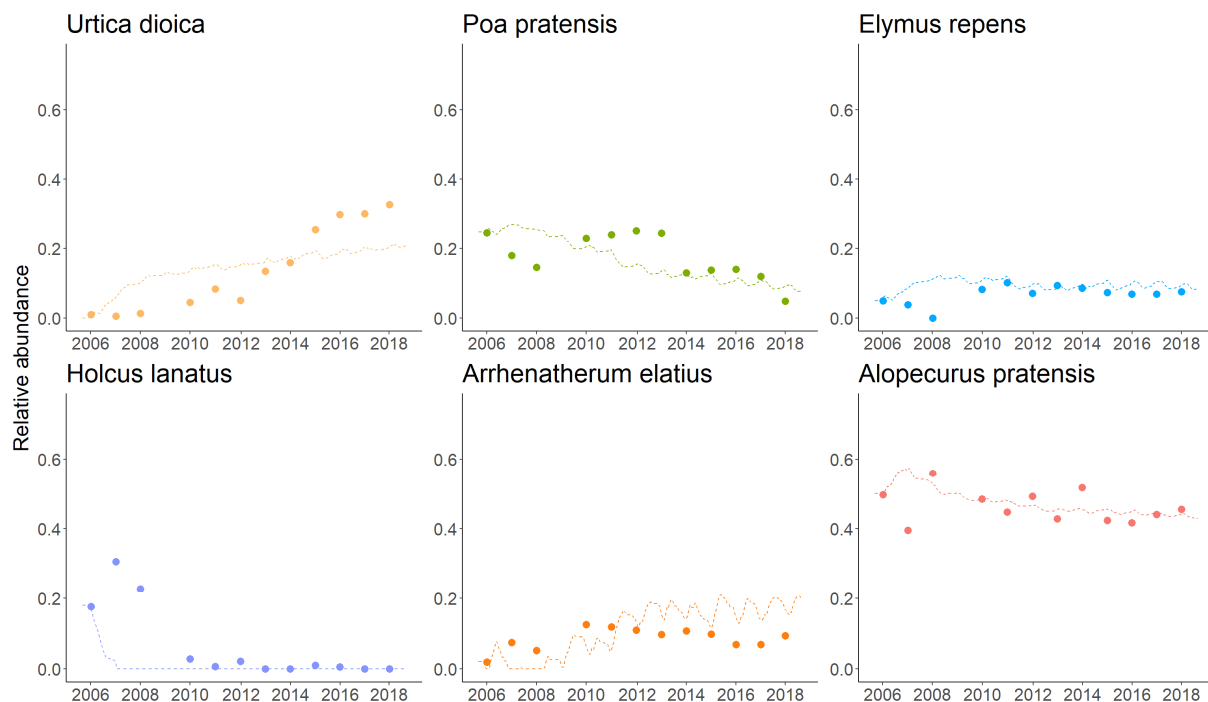

---

**Figure S16.** Observed (dots) and ModVege-CoSMo simulated (lines) fluctuations in the relative abundance of plant species in the treatment Ab of block 2.



### 6.2.3 Community traits

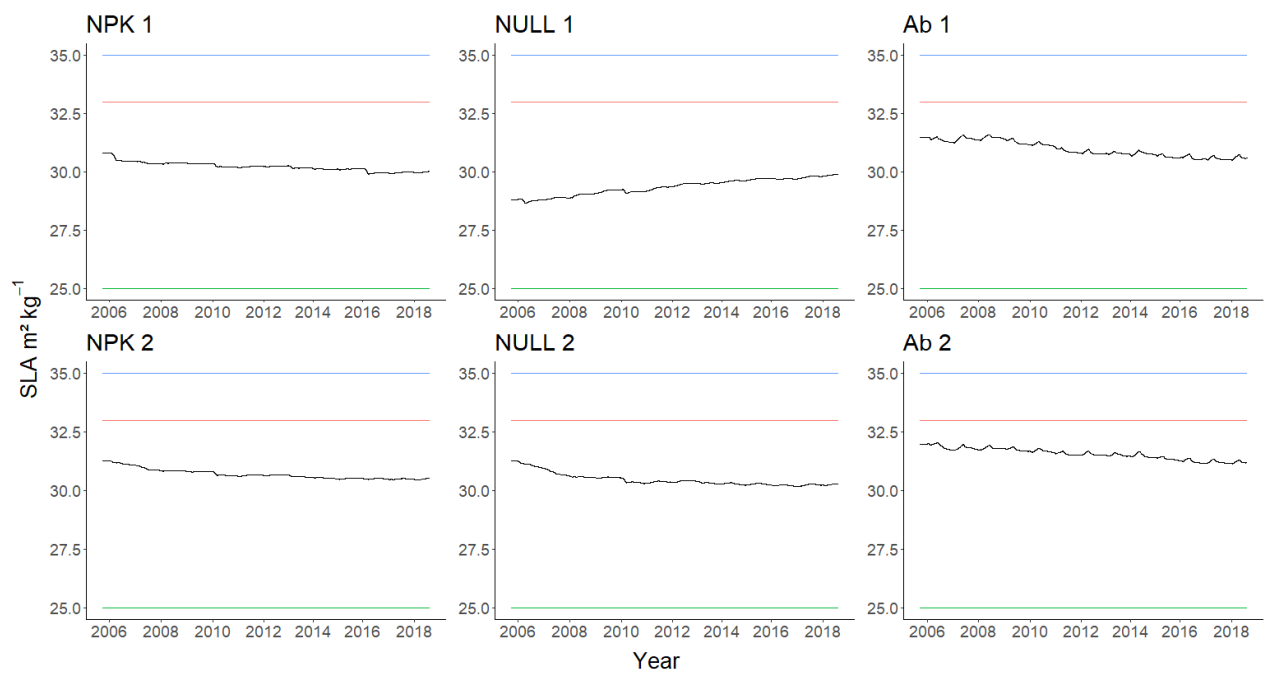

**Figure S17.** Daily changes in the specific leaf area (SLA) of the community during the simulation period compared to the fixed values set for the plant (grass) functional types (A: red line; B: green line; b: blue line) present in the community (horizontal lines, overlapping for the same values) for three treatments (NPK: fertilised; Null: unfertilised; Ab: abandoned) and two blocks (1, 2).

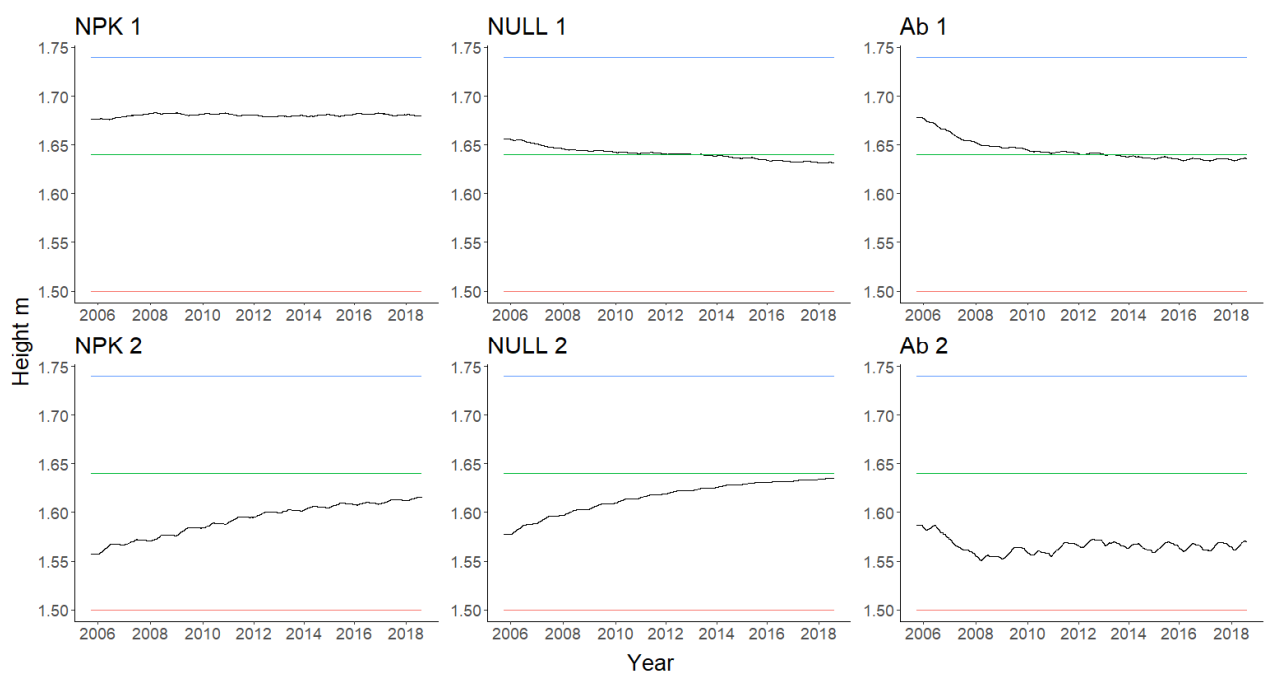

---

**Figure S18.** Daily changes in the height of the community during the simulation period compared to the fixed values set for the plant (grass) functional types (A: red line; B: green line; b: blue line) present in the community (horizontal lines, overlapping for the same values) for three treatments (NPK: fertilised; Null: unfertilised; Ab: abandoned) and two blocks (1, 2).
